# Supplementary material for: The increasing importance of atmospheric demand for ecosystem water and carbon fluxes
Source: Springer Nature journal article supplement (doi:10.1038/nclimate3114), 2016-09-05
Supplement: 41558_2016_BFnclimate3114_MOESM459_ESM.pdf [file 41558_2016_BFnclimate3114_MOESM459_ESM.pdf]

## Supplementary Information and Discussion for “The increasing importance of atmospheric demand for ecosystem water and carbon fluxes”

### Contents:

|                                                                                               |    |
|-----------------------------------------------------------------------------------------------|----|
| Section S1: Ameriflux data quality control and filtering                                      | 2  |
| Section S2: Selecting the model for potential evapotranspiration (PET)                        | 6  |
| Section S3: The use of soil moisture content as an indicator of plant water availability      | 9  |
| Section S4: Determining the well-watered reference surface conductance (i.e. $G_{S,ref,ww}$ ) | 10 |
| Section S5: The relationship between VPD and soil moisture content at various timescales      | 11 |
| Section S6: The site-specific parameterizations for $G_{S,ref}$ and $m$                       | 15 |
| Section S7: Effects of other meteorological drivers on $G_{S,ref}$                            | 17 |
| Section S8: Future projections – model estimates and downscaling                              | 20 |

## Section S1: Ameriflux Data Quality Control and filtering: Ameriflux Study Sites are described in Table S1:

**Table S1: The Ameriflux synthesis sites.** 'h' indicates canopy height. The 'DOY start' and 'DOY end' dates indicate the start and end of the site-specific analysis period, which is assumed to be the period of time during which leaf area index is relatively constant. DI\_PM indicates the dryness index (= mean annual potential evapotranspiration/precipitation) determined using the Penman-Monteith model for potential evapotranspiration. 'MAP' is mean annual precipitation derived from the FLUXNET database. Sites that are included in the analysis of future climate effects are indicated with a 'Y.'

| SITE NAME                    | CODE   | LAT   | LONG     | STATE | TYPE | h<br>(m) | Years used      | DOY<br>Start | DOY<br>End | DI_PM | MAP<br>(mm) | Future<br>analysis? | Reference |
|------------------------------|--------|-------|----------|-------|------|----------|-----------------|--------------|------------|-------|-------------|---------------------|-----------|
| ARM - MAIN                   | US-ARM | 36.61 | -97.49   | OK    | CRO  | 0.5      | 2003-2012       | 141          | 239        | 1.52  | 843         | Y                   | 1         |
| Bartlett Experimental Forest | US-BAR | 44.06 | -71.29   | NH    | DBF  | 19       | 2005-2011       | 169          | 225        | 0.76  | 1246        |                     | 2         |
| Black Hills                  | US-BLK | 44.16 | -103.65  | SD    | ENF  | 12       | 2004-2008       | 169          | 225        | 2.4   | 574         |                     |           |
| Blogett                      | US-BLO | 38.9  | -120.63  | CA    | ENF  | 7        | 2001-2007       | 170          | 250        | 1.08  | 1226        |                     | 3         |
| Bondville Main               | US-BO1 | 40.01 | -88.29   | IL    | CRO  | 3        | 2001-2008       | 210          | 270        | 1.02  | 991         | Y                   | 4         |
| Brooks Field 11              | US-BR3 | 41.97 | -93.69   | IA    | CRO  | 1        | 2005-2011 (odd) | 200          | 250        | 0.67  | 847         |                     | 5         |
| Duke Forest hardwood         | US-DK2 | 35.97 | -79.09   | NC    | DBF  | 27       | 2001-2008       | 141          | 239        | 1.24  | 1170        | Y                   | 6,7       |
| Duke Forest loblolly pine    | US-DK3 | 35.98 | -79.09   | NC    | ENF  | 16.5     | 2001-2008       | 127          | 253        | 1.37  | 1170        | Y                   | 6,7       |
| Duke Forest open field       | US-DK1 | 35.97 | -79.1    | NC    | GRA  | 1        | 2001-2008       | 141          | 239        | 1.18  | 1170        | Y                   | 6,7       |
| Fermi Agriculture            | US-IB1 | 41.86 | -88.22   | IL    | CRO  | 0.3      | 2005-2011 (odd) | 200          | 250        | 0.56  | 929         |                     | 8         |
| Fermi Prairie                | US-IB2 | 41.84 | -88.24   | IL    | GRA  | 0.3      | 2005-2011       | 155          | 225        | 0.918 | 930         |                     | 8         |
| Flagstaff Managed Forest     | US-FMF | 35.09 | -111.763 | AZ    | ENF  | 18       | 2006-2010       | 169          | 239        | 4.02  | 546         |                     | 9         |
| Flagstaff Unmanaged Forest   | US-FUF | 35.09 | -111.76  | AZ    | ENF  | 18       | 2006-2010       | 169          | 267        | 3.38  | 562         |                     | 9         |
| Freeman Ranch                | US-FR2 | 29.95 | -98      | TX    | SAV  | 4        | 2005-2008       | 113          | 281        | 2.15  | 864         |                     | 10        |
| GLEES                        | US-GLE | 41.36 | -106.24  | WY    | ENF  | 12.1     | 2005-2012       | 210          | 240        | 0.93  | 525         |                     | 11        |
| Kansas Field Station         | US-KFS | 39.06 | -95.19   | KS    | GRA  | 0.5      | 2008-2012       | 140          | 253        | 1.02  | 1014        |                     | 12        |
| Kendall Grassland            | US-WKG | 31.74 | -109.94  | AZ    | GRA  | 0.1      | 2005-2012       | 113          | 281        | 4.36  | 407         |                     | 13        |
| KennedyScrub Oak             | US-KS2 | 28.61 | -80.67   | FL    | SRB  | 1.5      | 2000-2006       | 29           | 337        | 0.8   | 1310        |                     |           |
| Konza Prairie                | US-KON | 39.08 | -96.56   | KS    | GRA  | 0.4      | 2007-2012       | 141          | 239        | 1.4   | 867         |                     | 12        |
| Lucky Hills Shrubland        | US-WHS | 31.75 | -110.05  | AZ    | SRB  | 1        | 2008-2012       | 113          | 281        | 7.89  | 320         | Y                   | 13        |
| Mary's River Fir             | US-MRF | 44.65 | -123.55  | OR    | ENF  | 34       | 2006-2011       | 141          | 253        | 0.45  | 1820        |                     | 14        |
| Mead Irrigated               | US-NE1 | 41.17 | -96.48   | NE    | CRO  | 1        | 2001-2012       | 200          | 250        | 0.862 | 790         |                     | 15        |
| Mead Rainfed                 | US-NE3 | 41.18 | -96.44   | NE    | CRO  | 1        | 2001-2011 (odd) | 200          | 250        | 0.429 | 784         |                     | 15        |
| Metolius Intermediate Pine   | US-ME2 | 44.45 | -121.56  | OR    | ENF  | 22       | 2002-2012       | 169          | 225        | 2.55  | 523         | Y                   | 16        |
| Metolius Second Young Pine   | US-ME3 | 44.5  | -121.62  | OR    | ENF  | 3        | 2004-2007       | 155          | 220        | 1.41  | 719         |                     | 17        |
| Missouri Ozark Site          | US-MOZ | 38.74 | -92.2    | MO    | DBH  | 24.2     | 2004-2010       | 141          | 239        | 1.89  | 986         | Y                   | 18,19     |

Table S1 continued

| SITE NAME                   | CODE   | LAT   | LONG    | STATE | TYPE | <i>h</i><br>(m) | Years used | PGS<br>Start | PGS<br>End | DI_PM | MAP<br>(mm) | Future<br>analysis? | Reference |
|-----------------------------|--------|-------|---------|-------|------|-----------------|------------|--------------|------------|-------|-------------|---------------------|-----------|
| Morgan-Monroe State Forest  | US-MMS | 39.32 | -86.41  | IN    | DBF  | 27              | 2000-2012  | 141          | 239        | 1.43  | 1032        | Y                   | 20        |
| NC loblolly pine            | US-NC2 | 35.8  | -76.67  | NC    | ENF  | 14.1            | 2005-2010  | 113          | 267        | 1.24  | 1320        |                     | 21        |
| Niwot Ridge                 | US-NR1 | 40.03 | -105.55 | CO    | ENF  | 11.5            | 2000-2012  | 160          | 230        | 1.76  | 800         | Y                   | 22        |
| Oak Openings                | US-OHO | 41.55 | -83.84  | OH    | DBF  | 24              | 2004-2012  | 160          | 239        | 1.2   | 849         | Y                   | 23        |
| Santa Rita Creosote         | US-SRC | 31.91 | -110.84 | AZ    | SRB  | 1.7             | 2008-2012  | 57           | 281        | 5.56  | 294*        |                     | 24        |
| Santa Rita Grassland        | US-SRG | 31.79 | -110.83 | AZ    | GRA  | 0.5             | 2008-2014  | 85           | 267        | 5.85  | 420         |                     |           |
| Santa Rita Mesquite         | US-SRM | 31.82 | -110.87 | AZ    | SAV  | 2.5             | 2004-2012  | 71           | 281        | 8.06  | 380         | Y                   | 13        |
| Sylvania                    | US-SYV | 46.24 | -89.35  | MI    | ENF  | 22              | 2001-2008  | 169          | 239        | 0.8   | 380         | Y                   | 25        |
| Tonzi Ranch                 | US-TON | 38.43 | -120.97 | CA    | SAV  | 9               | 2001-2012  | 100          | 170        | 3.48  | 559         | Y                   | 26        |
| U. of MI Biological Station | US-UMB | 45.56 | -84.71  | MI    | DBF  | 21              | 2007-2012  | 169          | 239        | 1.347 | 803         |                     | 27        |
| Vaira Ranch                 | US-VAR | 38.41 | -120.95 | CA    | GRA  | 0.55            | 2000-2012  | 100          | 170        | 2.28  | 559         | Y                   | 26        |
| Walker Branch               | US-WBW | 35.96 | -84.29  | TN    | DBH  | 25              | 1998-2006  | 141          | 253        | 0.8   | 1372        | Y                   | 28        |
| Willow Creek                | UW-WCR | 45.81 | -90.08  | WI    | DBF  | 24.2            | 2000-2012  | 183          | 225        | 0.59  | 787         |                     | 25        |

\* Mean annual precipitation data were not reported to FLUXDATA.org for this site; MAP is therefore that reported in reference 24

Half-hourly or hourly records of eddy-covariance derived ET and ancillary meteorological data were obtained from 38 Ameriflux sites in the continental U.S. Sites were chosen for inclusion in the study if at least four years of data, including soil moisture data, were available and generally free of large gaps, though most flux records were much longer (see Table S1).

**Hourly data quality control:** The ET data were subjected to a standardized quality control procedure whereby data were first filtered to remove missing data and ET measurements greater than 2 mm/hour or less than 0.6 mm/hour. Meteorological data were also screened for obvious outliers (i.e. air temperature less than  $-30^{\circ}\text{C}$  or greater than  $50^{\circ}\text{C}$ ,  $\text{VPD} < 0$ , net radiation less than  $-500 \text{ W m}^{-2}$  or greater than  $1500 \text{ W m}^{-2}$ ). Data were not gapfilled; rather, all analysis relied only on screened observations. Most of the analysis was limited to daytime periods ( $R_n > 50 \text{ W m}^{-2}$ ) when wind speed exceeded  $1 \text{ m s}^{-1}$  and  $\text{VPD} > 0.6 \text{ kPa}$  (to minimize stability effects).

**Filtering data to periods of relatively stationary leaf area index:** Our analysis includes sites that span a wide range of leaf area index and canopy height, which are variables known to affect vegetative hydraulic functioning<sup>29, 30</sup>. Within a site, temporal variation in leaf area or other aspects of canopy architecture were not explicitly considered, though they may also have affected the temporal dynamics of ET. To minimize the influence of those effects, we filtered our data to exclude periods when leaf area was expected to be low or highly dynamic. In evergreen forests, the analysis period was defined to start two weeks after the average date of the last sub-zero hourly air temperature observation, and was defined to end one week before the average date of the first sub-zero hourly air temperature observation in the fall/winter. In deciduous forests and temperate grasslands, the analysis period was defined to start three weeks after the average date of the last sub-zero hourly air temperature observation, and was defined to end two weeks before the average date of the first sub-zero hourly air temperature observation in the fall/winter. In croplands, semi-arid grassland and shrublands, and Mediterranean ecosystems (i.e. US-TON, US-VAR), the analysis period was defined based on previously published site-specific estimates of leaf area or communication from site data providers. The start and end of the analysis period at each site are given in Table S1.

**Limiting the analysis to exclude low VPD:** When parameterizing the model of Eq. 1 in the main text, we limited the data to those collected when  $\text{VPD} > 1.0 \text{ kPa}$ . This approach is consistent with other work<sup>31</sup>, and recognizes that estimates of conductances become unreliable when they are derived by dividing measured water fluxes by near-zero VPD. Furthermore, at low VPD when atmospheric conditions are often stable, boundary layer conductances may become an important constraint on observations of ET. These challenges are exacerbated by the fact that, at low VPD, ET fluxes are also low and of a magnitude comparable to the uncertainty in the observations themselves.

When using the soil-moisture-specific parameterizations of Eq. 1 to determine the total growing season limitations to  $G_s$  and ET, we assume that VPD is not limiting when it is less than 0.6 kPa. To an extent, this assumption is one of convenience, since the model of Eq. 1 can produce large errors when VPD is close to zero (and  $\ln(\text{VPD})$  is approaching infinity). We note, however, that the difference between PET and ET is typically near zero or negative when  $\text{VPD} < 0.6 \text{ kPa}$  (Figure S1). Specifically, across all sites, a linear model for PET-ET as a function of VPD tends to cross zero at  $\text{VPD} = 0.6 \text{ kPa}$  on average (std.dev = 0.3 kPa), indicating that at low VPD, ET is not limited from its potential rate.

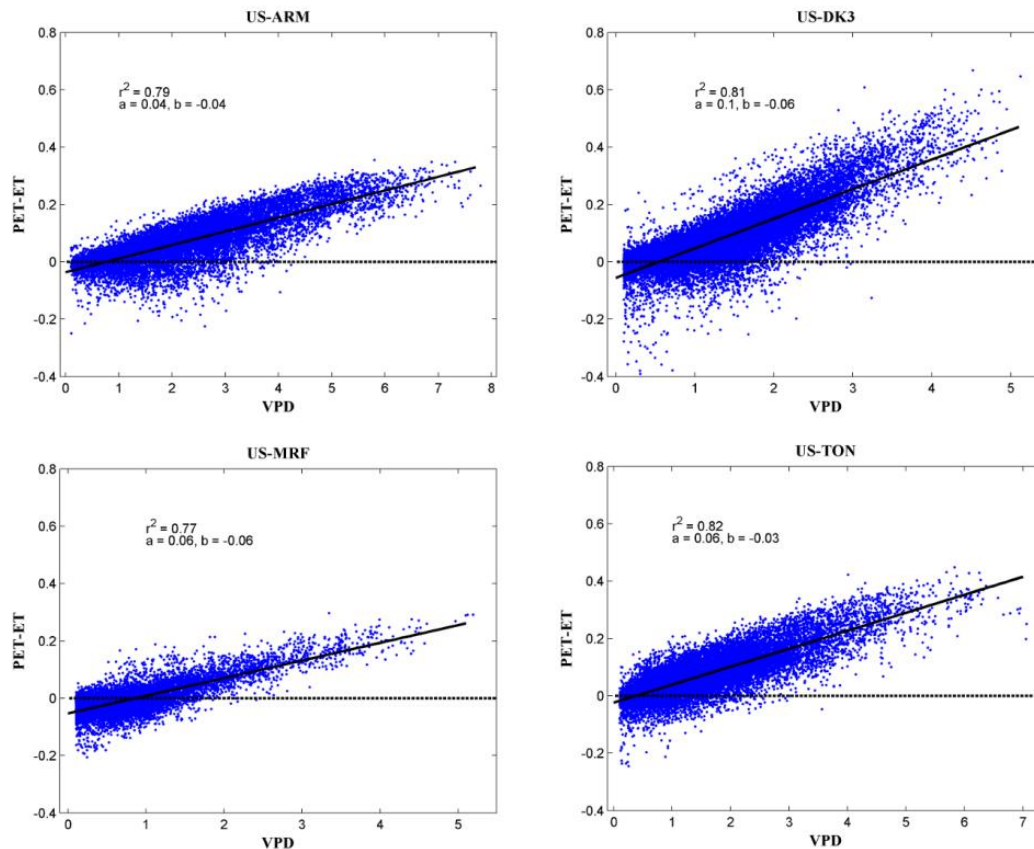

Figure S1: The relationship between PET-ET (i.e. the difference between potential and observed ET) as a function of VPD for four representative sites. The slope ( $a$ ) and intercept ( $b$ ) of the derived linear relationship are also shown, together with the coefficient of correlation ( $r^2$ )

**Estimating the dryness index:** The estimates of the dryness index ( $DI = PET/P$ ), which rely on annual estimate of PET and P, are sensitive to missing meteorological data, and in particular missing precipitation data. As evidence, when the mean annual precipitation was determined from the hourly Level 2 Ameriflux data, the ratio of observed ET to observed precipitation (i.e. the evaporative fraction) exceeded 1.0 for about 30% of sites. A multi-year evaporative fraction greater than 1.0 is physically possible if a site experiences significant run-on soil moisture or groundwater convergence; however, in Ameriflux sites that tend to be biased to flat locations, significant run-on is not likely in most sites. Therefore, we calculated the DI using the long-term mean annual precipitation reported by each site to the Fluxnet Database (<http://fluxnet.ornl.gov/>) instead of calculating mean annual precipitation from the Level 2 Ameriflux data. There may be some discrepancies between the DI estimated this way and the true DI for each site's study period if the mean annual precipitation during the study period is much different than the longer-term reported average. However, because the site-specific study periods are generally long and are not limited to the same years (see Table S1), systematic biases across sites (for example due to the occurrence of a large regional drought event) should be minimal.

## Section S2: Selecting the model for potential evapotranspiration (PET)

In this study, the potential evapotranspiration rate (PET) is used to calculate the dryness index, and also to quantify limitations to ET imposed by soil moisture and VPD. In many previous studies focused on understanding ecosystem hydrologic processes, the PET has been calculated using the Priestley-Taylor equation<sup>32</sup>, which may be represented as:

$$PET_{PT} = a_{PT} \frac{S \cdot R_n}{S + \gamma} \cdot \frac{1}{\lambda_v} \quad (S1)$$

where  $a_{PT} = 1.26$  is the Priestley-Taylor coefficient,  $S$  is the temperature-dependent slope of the saturation-vapor pressure curve,  $\gamma$  is the temperature-dependent psychrometric constant, and  $\lambda_v$  is the temperature-dependent latent heat of vaporization. In this study, which is strongly focused on atmospheric limitations to ET, we estimate PET using the Penman-Monteith<sup>33, 34</sup> approach, which in addition to accounting for energy constraints to ET, also accounts for aerodynamic and atmospheric constraints. The Penman-Monteith equation for PET may be expressed as:

$$PET_{PM} = \frac{S \cdot R_n + c_p \rho_a g_a VPD}{\lambda_v \left[ S + \gamma \left( 1 + \frac{g_a}{G_s} \right) \right]} \quad (S2)$$

where  $S$  is the temperature-dependent slope of the saturation-vapor pressure curve,  $R_n$  is net radiation,  $\rho_a$  is the density of dry air,  $\gamma$  is the temperature-dependent psychrometric constant,  $\lambda_v$  is the temperature-dependent latent heat of vaporization,  $g_a$  is the aerodynamic conductance, and  $c_p$  is the specific heat capacity for dry air.

The formal definition of the Penman-Monteith equation for canopy evapotranspiration relies on a big-leaf assumption, and in many applications  $G_s$  is equated to the canopy-level stomatal conductance<sup>35</sup>. However, ecosystem evapotranspiration includes a significant contribution from soil evaporation (typically on the order of 15-30% for a range of biomes<sup>36, 37, 38, 39, 40</sup>). In modeling studies, this problem is often met with a two-source (i.e. canopy and soil) modeling procedure where both canopy and soil evaporation are independently simulated from Penman-Monteith type equations. However, in data driven applications like this one, when surface conductance is derived by inverting the Penman-Monteith equation from measured ecosystem scale ET observations, the derived  $G_s$  is influenced by soil evaporation, and should not be assumed to be representative of canopy stomatal conductance alone<sup>35, 41, 42, 43, 44</sup>. Because soil evaporation increases linearly with VPD, a greater ratio of soil evaporation to total evapotranspiration will tend to reduce the magnitude of the VPD sensitivity parameter  $m$ .

The aerodynamic conductance ( $g_a$ ) is formulated as a function of wind speed and canopy height after Campbell & Norman (1998)<sup>45</sup> as:

$$g_a = \frac{U \cdot k^2}{\left[ \ln \left( \frac{z_m - z_d}{z_o} \right) \right]^2} \quad (S3)$$

Where  $U$  is the measured wind speed (m/s),  $k$  is the Von Karman Constant,  $z_m$  is the measurement height,  $z_d$  is the zero plane displacement, and  $z_o$  is the momentum roughness length. The  $z_d$  and  $z_o$  were taken as  $0.67h$  and  $0.1h$ , respectively, where  $h$  is canopy height, as is common practice in the absence of other information about these parameters<sup>45, 46</sup>. In some applications, it is common to incorporate a correction for stability effects on  $g_a$  via the modification:

$$g_a = \frac{U \cdot k^2}{\left[ \ln \left( \frac{z_m - z_d}{z_o} \right) + \Psi_H \right]^2} \quad (S4)$$

where the diabatic correction factor  $\Psi_H$  can be specified as a function of the ratio of convective to mechanical production of turbulence as described in Campbell & Norman (1998)<sup>45</sup>.

Filtering the data to remove observations collected when VPD < 0.6 kPa and wind speed < 1 m s<sup>-1</sup> should minimize the influence of stability effects on the derived surface conductance. To be sure, we repeated the analysis in a subset of sites spanning the range of dryness index for three scenarios: 1) no stability corrections to  $g_a$  (i.e. using Eq. S3) and no wind speed filter, 2) no stability corrections to  $g_a$  (i.e. using Eq. S3) with the wind speed filter, and 3) stability corrections to  $g_a$  using Eq. S4 with the wind speed filter. In US-DK3, the relationship between  $g_a$  and VPD was similar in all scenarios. In the other sites, the relationship between  $g_a$  and VPD was similar for scenario 1 & 2, but scenario 3 resulted in higher  $g_a$  at high VPD.

Importantly, however, regardless of which scenario was used, the relationship between  $G_s$  and VPD was similar in all sites, and nearly indistinguishable in most. Thus, we elected not to correct  $g_a$  for stability effects in order to minimize additional uncertainties associated with the parameterization of the stability correction itself.

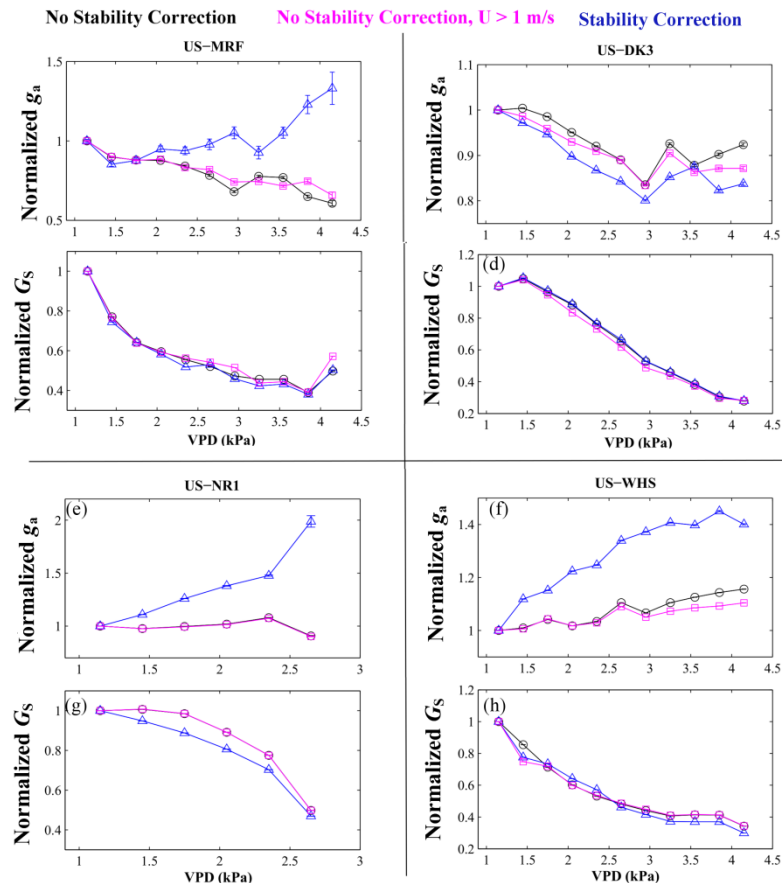

Figure S2: The relationship between aerodynamic conductance and VPD (panels a, c, e, g), and surface conductance ( $G_s$ ) and VPD (panels b, d, f, and h), showing results from the three stability correction scenarios.



When calculating  $PET_{PM}$  for use in determining the site dryness index, we elected to set  $G_s$  in Eq. S2 equal to .0148 m/s. This represents the highest value of the reference, well-watered surface conductance rate (i.e.  $G_{S,ref,ww}$ ) observed across the study domain. This approach of using a finite  $G_s$  to determine PET is conceptually consistent with the use of the Priestly-Taylor equation, since the parameter  $a_{PT}$  is set to approximate well-watered evapotranspiration rates from terrestrial ecosystems, and not, for example, open water (over which  $G_s$  is infinite).

The agreement between the dryness index calculated using  $PET_{PT}$  and  $PET_{PM}$  is shown for reference in Figure S3. The dryness index values tend to be higher when calculated using the Penman-Monteith equation, but overall the two estimates of PET are strongly correlated.

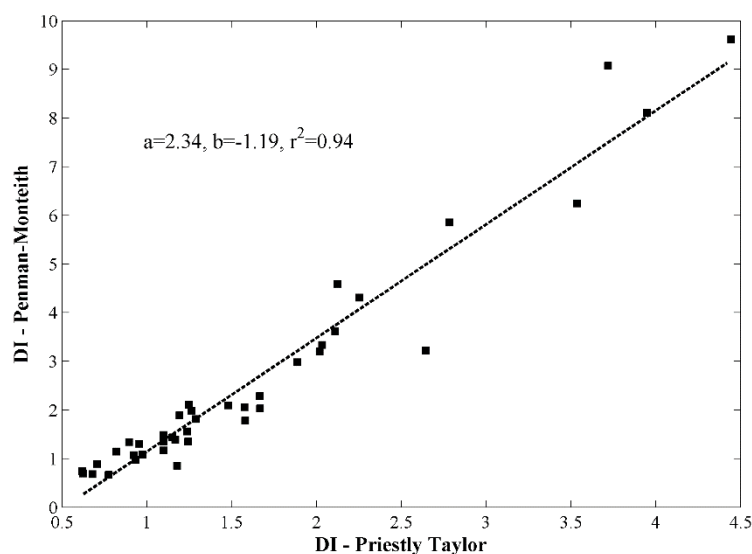

Figure S3: The relationship between dryness index estimated using the Penman-Monteith and Priestly-Taylor Models for PET.



142

### 143 Section S3: The use of soil moisture content as an indicator of plant water 144 availability

145 We elected to use the total volumetric soil moisture ( $\theta$ ) in the top 30 cm as the primary proxy for plant  
146 water availability. Most Ameriflux sites rely on time-domain reflectometry (TDR) measurements for  $\theta$ ,  
147 which often require a site-specific calibration. Details of these site-specific calibrations are not available  
148 in the Ameriflux database, and thus cross-site comparisons of soil moisture content should be approached  
149 with caution. In other studies, the relative extractable water (REW, which represents soil moisture content  
150 scaled by the minimum and maximum observed values) is used instead to facilitate cross-site comparisons  
151 of ecosystem water use<sup>47, 48</sup>.

152 It could be argued that soil water potential ( $\Psi_s$ ) is a more appropriate measure of soil water availability  
153 than either  $\theta$  or REW, since water tension in the soil is an important physical driver of water movement  
154 through soil matrices and plants<sup>49, 50</sup>. Unfortunately, soil water potential is rarely measured in the field.  
155 Occasionally, laboratory-based dry down experiments are used to derive an empirical relationship  
156 between  $\theta$  and  $\Psi_s$ . This relationship is not linear<sup>49</sup>, though it is monotonically increasing. As illustrated in  
157 Figure S4, in sites for which estimates of  $\Psi_s$  are available,  $\Psi_s$  increases more rapidly with increasing  $\theta$   
158 when the latter is low; consequently, the results of this study associated with the drier soil moisture bins  
159 will likely reflect the response to a relatively wider range of  $\Psi_s$  conditions.

160 It is important to note that the choice of the soil moisture variable (i.e.  $\theta$  vs. REW vs.  $\Psi_s$ ) has no effect on  
161 our primary results concerning the relative importance of soil moisture versus VPD limitations to surface  
162 conductance and ET (e.g. the results presented in Figures 2, 3 & 4 in the main text). This is because the  
163 analytical approach relies on binning the data into quantiles defined by the 0-15<sup>th</sup>, 15<sup>th</sup>-30<sup>th</sup>, 30<sup>th</sup>-50<sup>th</sup>, 50<sup>th</sup>-  
164 70<sup>th</sup>, 70<sup>th</sup>-90<sup>th</sup>, and 90<sup>th</sup>-100<sup>th</sup> percentiles of  $\theta$ , and then parameterizing Eq. 1 within each bin. Because the  
165 relationships between  $\theta$  and REW and  $\Psi_s$  are all monotonically increasing, the same data will fall into the  
166 same bins regardless of which soil moisture metric is used.

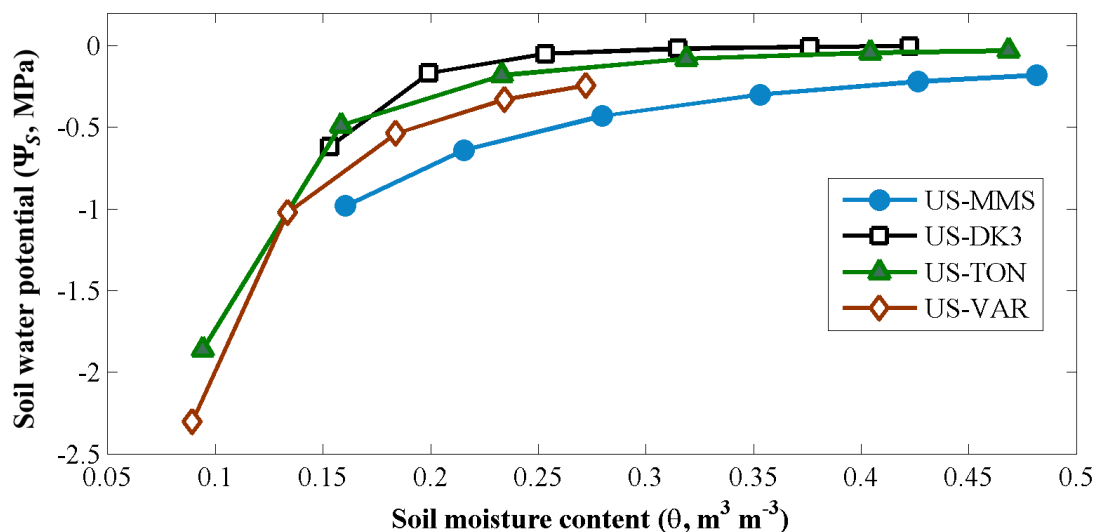

167

168 Figure S4: The relationship between soil water potential ( $\Psi_s$ ) and soil moisture content ( $\theta$ ) in four study sites for  
169 which site-specific relationships between  $\theta$  and  $\Psi_s$  were available (see references Wayson et al. 2016 for US-MMS,  
170 Hacke et al. 2000 for US-DK3, and Baldocchi et al. 2004 for US-TON and US-VAR.

#### S4. Determining the well-watered reference surface conductance (i.e. $G_{S,ref,ww}$ ).

The limitations to  $G_S$  imposed by soil moisture and VPD were estimated by comparing hourly estimates of  $G_S$  to the well-watered reference value of surface conductance (i.e.  $G_{S,ref,ww}$ ). This parameter represents the surface conductance when soil moisture content exceeds the 90<sup>th</sup> percentile in each site, and  $0.9 < VPD < 1.1$  kPa. Choosing the reference VPD of 1.0 kPa is consistent with previous work<sup>31</sup>. The approach recognizes the fact that surface conductance estimates at low VPD are sensitive to biases introduced by low boundary layer conductance and instabilities in the determination of  $G_S$  from ET when VPD is low.

The magnitude of  $G_{S,ref,ww}$  tends to be low in sites with a high dryness index, and variable but generally higher in more mesic sites (Figure S5). The low  $G_{S,ref,ww}$  in the driest sites is expected, as canopy stomatal conductance – an important component of  $G_S$  – is driven by leaf area<sup>51</sup>, which is very low in semi-arid ecosystems. The variability in  $G_{S,ref,ww}$  in more mesic sites may be explained, to an extent, by variation in leaf area as well as variation in canopy height, which introduces another important structural control on canopy stomatal conductance<sup>30, 52</sup>. While these sources of variability in well-watered  $G_S$  are an important long-term constraint on ecosystem carbon and water cycling, they are not the focus of this present study. We point readers elsewhere<sup>32</sup> for a more thorough treatment of the topic.

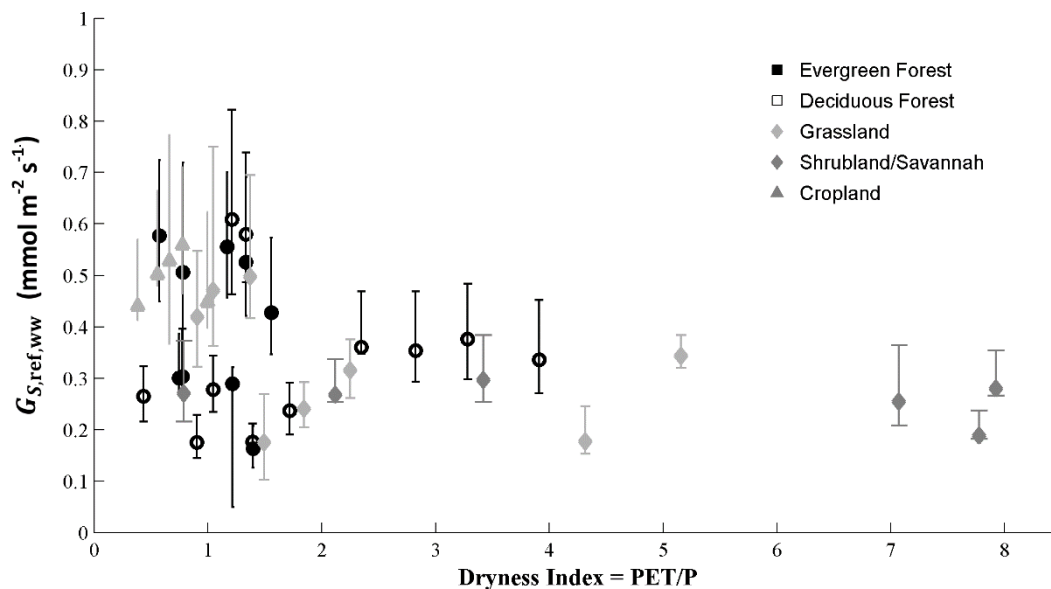

Figure S5: The relationship between the well-watered reference surface conductance ( $G_{S,ref,ww}$ ) and dryness index. Error bars indicates the 50% confidence interval on the estimate of  $G_{S,ref,ww}$  as derived from a non-parametric bootstrap.

## Section S5: The relationship between VPD and $\theta$ at various timescales

Our analysis leverages the fact that while VPD and  $\theta$  are moderately to strongly correlated at long time-scales (i.e. monthly to annual), they are relatively weakly coupled at the hourly and daily timescales over which Ameriflux data is gathered. In Figure 1 of the main text, we present a summary of the correlation between  $\theta$  and VPD averaged across all study sites for varying averaging periods (i.e. seasonal, monthly, weekly, daily, and hourly). For illustrative purpose, we show the data that inform that summary presentation for one representative site in Figure S6, and present the statistics of the linear regressions between the two variables over the various timescales in Table S2.

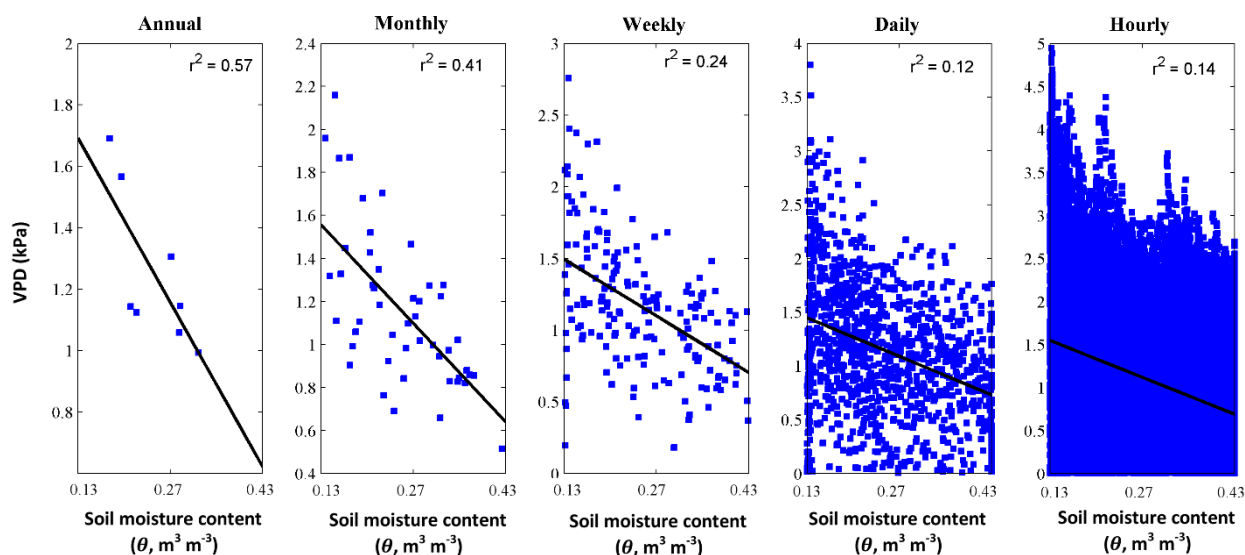

Figure S6: The relationship between vapor pressure deficit (VPD) and soil moisture content ( $\theta$ ) when both are averaged over various timescales. Data are from the US-DK3 (Duke Pine Forest).

*Table S2: The slope, intercept, and correlation coefficient of the relationship between vapor pressure deficit (VPD) as a linear function of soil moisture content ( $\theta$ ) inferred by averaging the data over various timescales. In general, the slope and intercept parameters are relatively stationary across timescales, but the two variables become increasingly decoupled (i.e.  $r^2$  is lower) at shorter timescales.*

|      | Slope |       |       |       |       | Intercept |       |      |      |      | correlation coefficient ( $r^2$ ) |       |      |      |      |
|------|-------|-------|-------|-------|-------|-----------|-------|------|------|------|-----------------------------------|-------|------|------|------|
|      | year  | month | week  | day   | hour  | year      | month | week | day  | hour | year                              | month | week | day  | hour |
| ARM  | -0.91 | -1.10 | -1.28 | -1.36 | -0.98 | 2.54      | 2.54  | 2.70 | 2.76 | 1.96 | 0.38                              | 0.12  | 0.15 | 0.14 | 0.06 |
| BAR  | -0.46 | -0.13 | -0.24 | -0.24 | -0.37 | 1.15      | 0.97  | 1.00 | 0.98 | 0.94 | 0.55                              | 0.02  | 0.04 | 0.02 | 0.03 |
| BLK  | -0.65 | -0.32 | -0.47 | -0.60 | -0.19 | 1.73      | 1.50  | 1.63 | 1.67 | 1.06 | 0.40                              | 0.04  | 0.07 | 0.04 | 0.01 |
| BLO  | 0.18  | -0.81 | -0.39 | -0.21 | -1.16 | 1.80      | 1.95  | 1.90 | 1.89 | 2.08 | 0.08                              | 0.20  | 0.04 | 0.01 | 0.32 |
| BO1  | -0.41 | -0.44 | -0.63 | -0.48 | -0.29 | 1.30      | 1.36  | 1.45 | 1.28 | 1.01 | 0.26                              | 0.22  | 0.24 | 0.10 | 0.01 |
| BR3  | 0.73  | 0.27  | -0.31 | -0.50 | 0.13  | 0.62      | 0.94  | 1.22 | 1.28 | 0.88 | 0.65                              | 0.10  | 0.09 | 0.15 | 0.00 |
| DK1  | -1.40 | -0.96 | -1.04 | -0.96 | -0.82 | 1.83      | 1.60  | 1.66 | 1.60 | 1.53 | 0.67                              | 0.40  | 0.31 | 0.19 | 0.13 |
| DK2  | -1.79 | -0.94 | -1.08 | -1.01 | -0.78 | 1.97      | 1.57  | 1.65 | 1.61 | 1.53 | 0.81                              | 0.36  | 0.31 | 0.21 | 0.13 |
| DK3  | -1.07 | -0.92 | -0.79 | -0.72 | -0.86 | 1.69      | 1.56  | 1.49 | 1.45 | 1.55 | 0.57                              | 0.42  | 0.25 | 0.12 | 0.15 |
| FMF  | 0.10  | -0.56 | -0.65 | -1.09 | -0.88 | 1.55      | 1.82  | 1.94 | 2.25 | 1.79 | 0.01                              | 0.07  | 0.09 | 0.12 | 0.08 |
| FR2  | -1.70 | -0.92 | -1.50 | -1.30 | -1.13 | 2.42      | 1.98  | 2.34 | 2.21 | 2.00 | 0.98                              | 0.18  | 0.55 | 0.33 | 0.14 |
| FUF  | -1.25 | -1.20 | -1.32 | -1.43 | -0.91 | 2.18      | 2.09  | 2.20 | 2.25 | 1.66 | 0.95                              | 0.64  | 0.57 | 0.40 | 0.16 |
| GLE  | 0.06  | 0.03  | 0.13  | 0.14  | 0.61  | 0.96      | 0.93  | 0.91 | 0.90 | 0.20 | 0.03                              | 0.01  | 0.04 | 0.01 | 0.16 |
| IB1  | -0.64 | -0.56 | -0.65 | -0.79 | -1.10 | 1.52      | 1.45  | 1.51 | 1.57 | 1.62 | 0.56                              | 0.30  | 0.42 | 0.29 | 0.16 |
| IB2  | -0.45 | -0.53 | -0.44 | -0.61 | -0.84 | 1.40      | 1.39  | 1.36 | 1.46 | 1.39 | 0.24                              | 0.23  | 0.12 | 0.10 | 0.10 |
| KFS  | -2.75 | -1.60 | -1.66 | -1.52 | -1.67 | 2.74      | 2.02  | 2.16 | 2.16 | 2.17 | 0.99                              | 0.34  | 0.36 | 0.25 | 0.28 |
| KON  | -0.68 | -1.42 | -1.41 | -1.21 | -1.23 | 2.05      | 2.41  | 2.49 | 2.34 | 2.10 | 0.49                              | 0.32  | 0.28 | 0.18 | 0.14 |
| KSO  | 0.25  | 0.10  | -0.09 | -0.20 | -0.22 | 1.10      | 1.11  | 1.20 | 1.22 | 1.25 | 0.03                              | 0.00  | 0.00 | 0.01 | 0.01 |
| ME2  | -0.48 | -0.68 | -0.38 | -0.61 | -1.27 | 1.63      | 1.53  | 1.51 | 1.64 | 1.78 | 0.11                              | 0.07  | 0.02 | 0.04 | 0.32 |
| ME3  | 0.62  | -0.48 | -0.37 | -0.63 | -1.38 | 1.79      | 2.00  | 2.03 | 2.17 | 2.11 | 0.06                              | 0.08  | 0.02 | 0.04 | 0.28 |
| MMS  | -0.96 | -0.42 | -0.29 | -0.33 | -0.78 | 1.52      | 1.18  | 1.09 | 1.12 | 1.32 | 0.43                              | 0.13  | 0.05 | 0.04 | 0.11 |
| MOZ  | -0.67 | -0.82 | -0.93 | -1.02 | -1.09 | 1.71      | 1.75  | 1.84 | 1.89 | 1.69 | 0.28                              | 0.26  | 0.27 | 0.19 | 0.15 |
| MRF  | 0.66  | -0.76 | -0.66 | -0.59 | -0.72 | 0.50      | 0.94  | 0.93 | 0.89 | 0.99 | 0.09                              | 0.52  | 0.27 | 0.10 | 0.17 |
| NC2  | -0.24 | -0.27 | -0.21 | -0.27 | -0.45 | 1.34      | 1.30  | 1.28 | 1.30 | 1.29 | 0.48                              | 0.12  | 0.04 | 0.03 | 0.04 |
| NE1  | -0.96 | -0.98 | -0.80 | -1.03 | -0.20 | 1.77      | 1.77  | 1.66 | 1.80 | 1.15 | 0.30                              | 0.33  | 0.21 | 0.18 | 0.00 |
| NE3  | -1.52 | -0.84 | -0.58 | -0.73 | -0.57 | 1.97      | 1.69  | 1.58 | 1.65 | 1.42 | 0.56                              | 0.32  | 0.18 | 0.15 | 0.04 |
| NR1  | -0.31 | -0.25 | -0.38 | -0.38 | -0.05 | 1.07      | 1.03  | 1.07 | 1.08 | 0.66 | 0.27                              | 0.17  | 0.16 | 0.06 | 0.00 |
| OHO  | -1.58 | -0.86 | -0.63 | -0.57 | -0.86 | 1.79      | 1.42  | 1.34 | 1.31 | 1.33 | 0.47                              | 0.35  | 0.19 | 0.11 | 0.15 |
| SRC  | 0.82  | -1.09 | -1.08 | -1.11 | -1.18 | 2.25      | 2.98  | 3.03 | 3.02 | 2.92 | 0.27                              | 0.10  | 0.10 | 0.09 | 0.07 |
| SRG  | -1.17 | -1.90 | -1.73 | -1.73 | -1.95 | 2.90      | 3.13  | 3.07 | 3.09 | 3.14 | 0.64                              | 0.45  | 0.34 | 0.24 | 0.33 |
| SRM  | -1.61 | -0.80 | -1.22 | -1.38 | -1.72 | 3.04      | 2.74  | 2.93 | 2.99 | 2.85 | 0.17                              | 0.07  | 0.20 | 0.20 | 0.22 |
| SYV  | 0.04  | -0.16 | -0.13 | -0.08 | -0.51 | 1.00      | 1.03  | 1.06 | 1.04 | 1.11 | 0.00                              | 0.02  | 0.01 | 0.00 | 0.04 |
| TON  | -0.33 | -0.27 | -0.45 | -0.51 | -0.64 | 0.88      | 0.83  | 0.90 | 0.91 | 1.06 | 0.47                              | 0.05  | 0.12 | 0.11 | 0.08 |
| UMB  | 0.09  | -0.95 | -0.69 | -0.68 | -0.80 | 0.88      | 1.25  | 1.15 | 1.13 | 1.20 | 0.03                              | 0.54  | 0.30 | 0.18 | 0.17 |
| VAR  | -0.32 | -0.57 | -0.51 | -0.56 | -0.56 | 0.87      | 0.98  | 0.93 | 0.95 | 0.98 | 0.17                              | 0.27  | 0.18 | 0.13 | 0.09 |
| WBW  | -0.83 | -0.22 | -0.30 | -0.41 | -0.59 | 1.52      | 1.12  | 1.18 | 1.23 | 1.32 | 0.13                              | 0.03  | 0.05 | 0.06 | 0.07 |
| WCR  | 0.12  | 0.04  | -0.06 | -0.16 | 0.02  | 0.47      | 0.49  | 0.56 | 0.60 | 0.41 | 0.05                              | 0.00  | 0.00 | 0.01 | 0.00 |
| WHS  | -2.49 | -0.69 | -1.38 | -1.49 | -0.95 | 3.65      | 2.76  | 3.17 | 3.24 | 2.61 | 0.51                              | 0.03  | 0.16 | 0.17 | 0.05 |
| WKG  | -0.03 | -1.05 | -1.09 | -1.16 | -0.99 | 2.38      | 2.63  | 2.77 | 2.82 | 2.41 | 0.00                              | 0.12  | 0.15 | 0.13 | 0.06 |
| Mean | -0.62 | -0.67 | -0.71 | -0.76 | -0.77 | 1.68      | 1.63  | 1.69 | 1.71 | 1.55 | 0.36                              | 0.20  | 0.18 | 0.13 | 0.12 |
| Std  | 0.84  | 0.47  | 0.48  | 0.46  | 0.52  | 0.71      | 0.65  | 0.69 | 0.70 | 0.66 | 0.29                              | 0.17  | 0.14 | 0.09 | 0.09 |

**Section S6: Determining soil moisture as compared to VPD constraints to  $G_s$  and ET:** The growing season ET and meteorological data were sorted into bins representing the 0-15<sup>th</sup>, 15<sup>th</sup>-30<sup>th</sup>, 30<sup>th</sup>-50<sup>th</sup>, 50<sup>th</sup>-70<sup>th</sup>, 70<sup>th</sup>-90<sup>th</sup>, and 90<sup>th</sup>-100<sup>th</sup> percentiles of  $\theta$ , spanning a gradient of dry to wet conditions in each site. Within each soil moisture bin, we further sorted the data on the basis of VPD; the VPD bins had a width of 0.2 kPa, and there were  $j = 1, 2, \dots, N_i$  VPD bins in each soil moisture bin, where  $N_i$  varies as a function of the maximum VPD observed at each site. The mean  $G_s$  in each bin was determined provided there were more than 10 data points in any given  $(i, j)$  bin.

The binned averages were used to derive site- and soil-moisture-specific parameterizations for Eq. 1 in the main text, which were leveraged to quantify the total growing season average supply and demand limitations to  $G_s$  and ET. Briefly,  $\theta$  constraints were inferred from changes in the intercept parameter ( $G_{s,ref}$ ), and VPD constraints were inferred from the sensitivity parameter  $m$ . Estimates of hourly  $G_s$  reflecting either  $\theta$  or VPD control for all daytime periods were then subtracted from the  $G_{s,ref,ww}$  to quantify the magnitude of limitations to  $G_s$  attributable to each driver. These estimates of hourly  $G_s$  were then used in Eq. S2 to generate estimates of ET that reflect either  $\theta$  or VPD constraints to  $G_s$ . Limitations to ET were then defined as the difference between hourly PET and ET, where the PET is generated using Eq. S2 forced with the site-specific  $G_{s,ref,ww}$ . In most sites, the reported  $\theta$  corresponds to integrated observations over the top 30 cm of the soil. The soil moisture dynamics in the top 30 cm may not always be well coupled to soil moisture at depth, which represents a potential source of bias in sites with deeper roots.

In Figure 2 of the main text, we show representative results from four sites. Here are analogous figures for all study sites. The fitted lines, which show the model of Eq. 1 within each soil moisture bin, do not extend below VPD < 1.0 kPa, as those data were not used to drive the regressions due again to instabilities in the observations at low VPD.

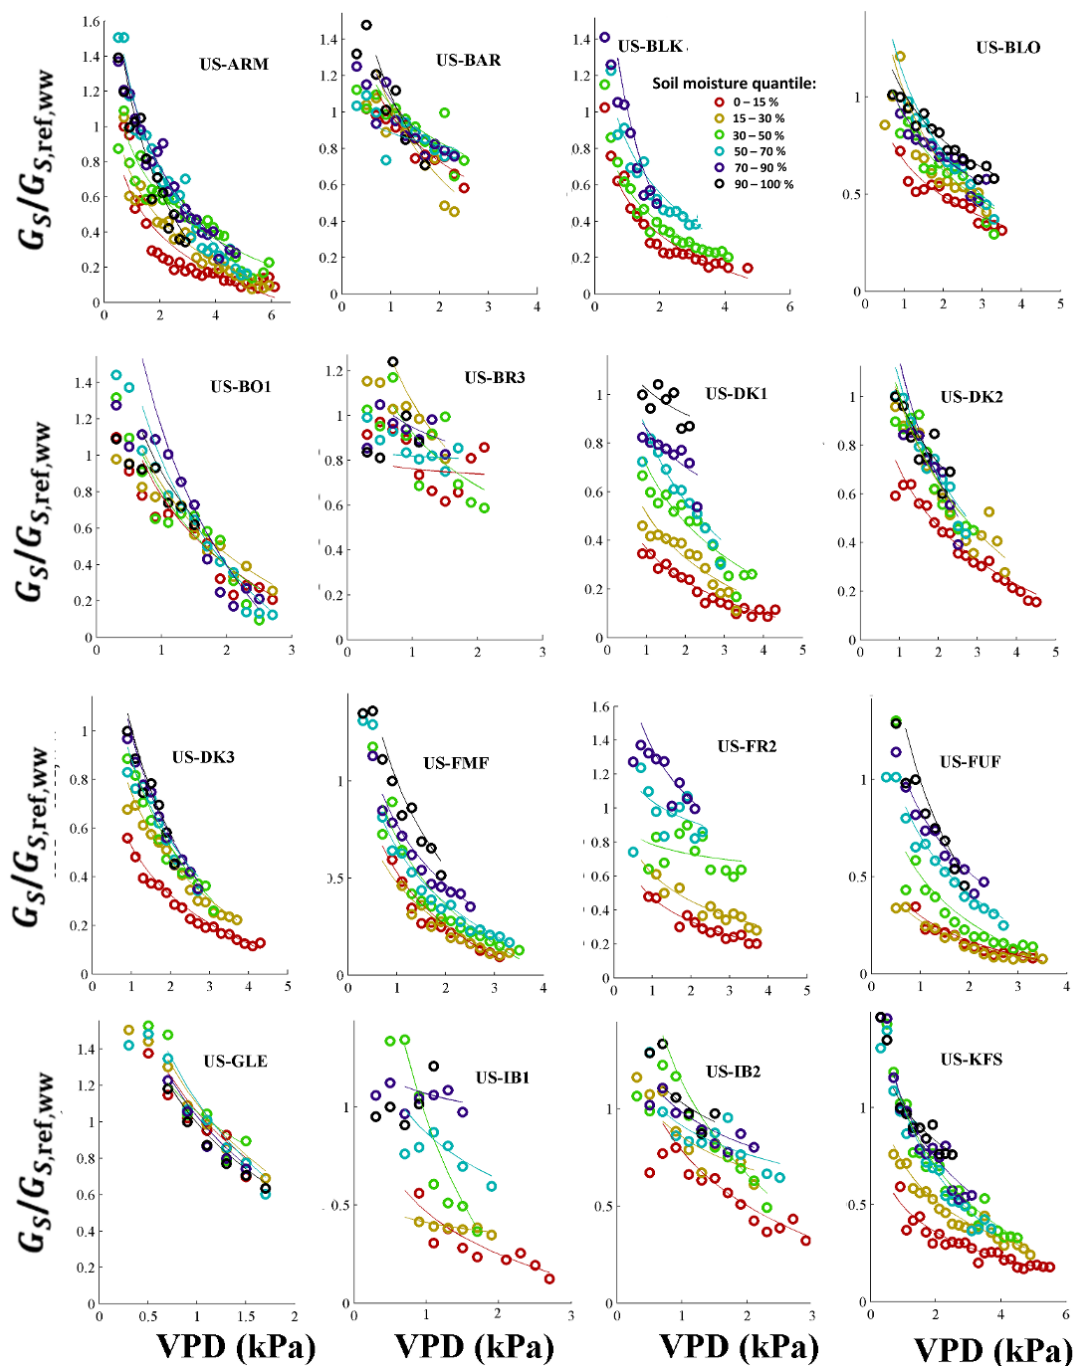

Figure S7. Same as Figure 2a-d in the main text, but for the first sixteen study sites (in alphabetical order).

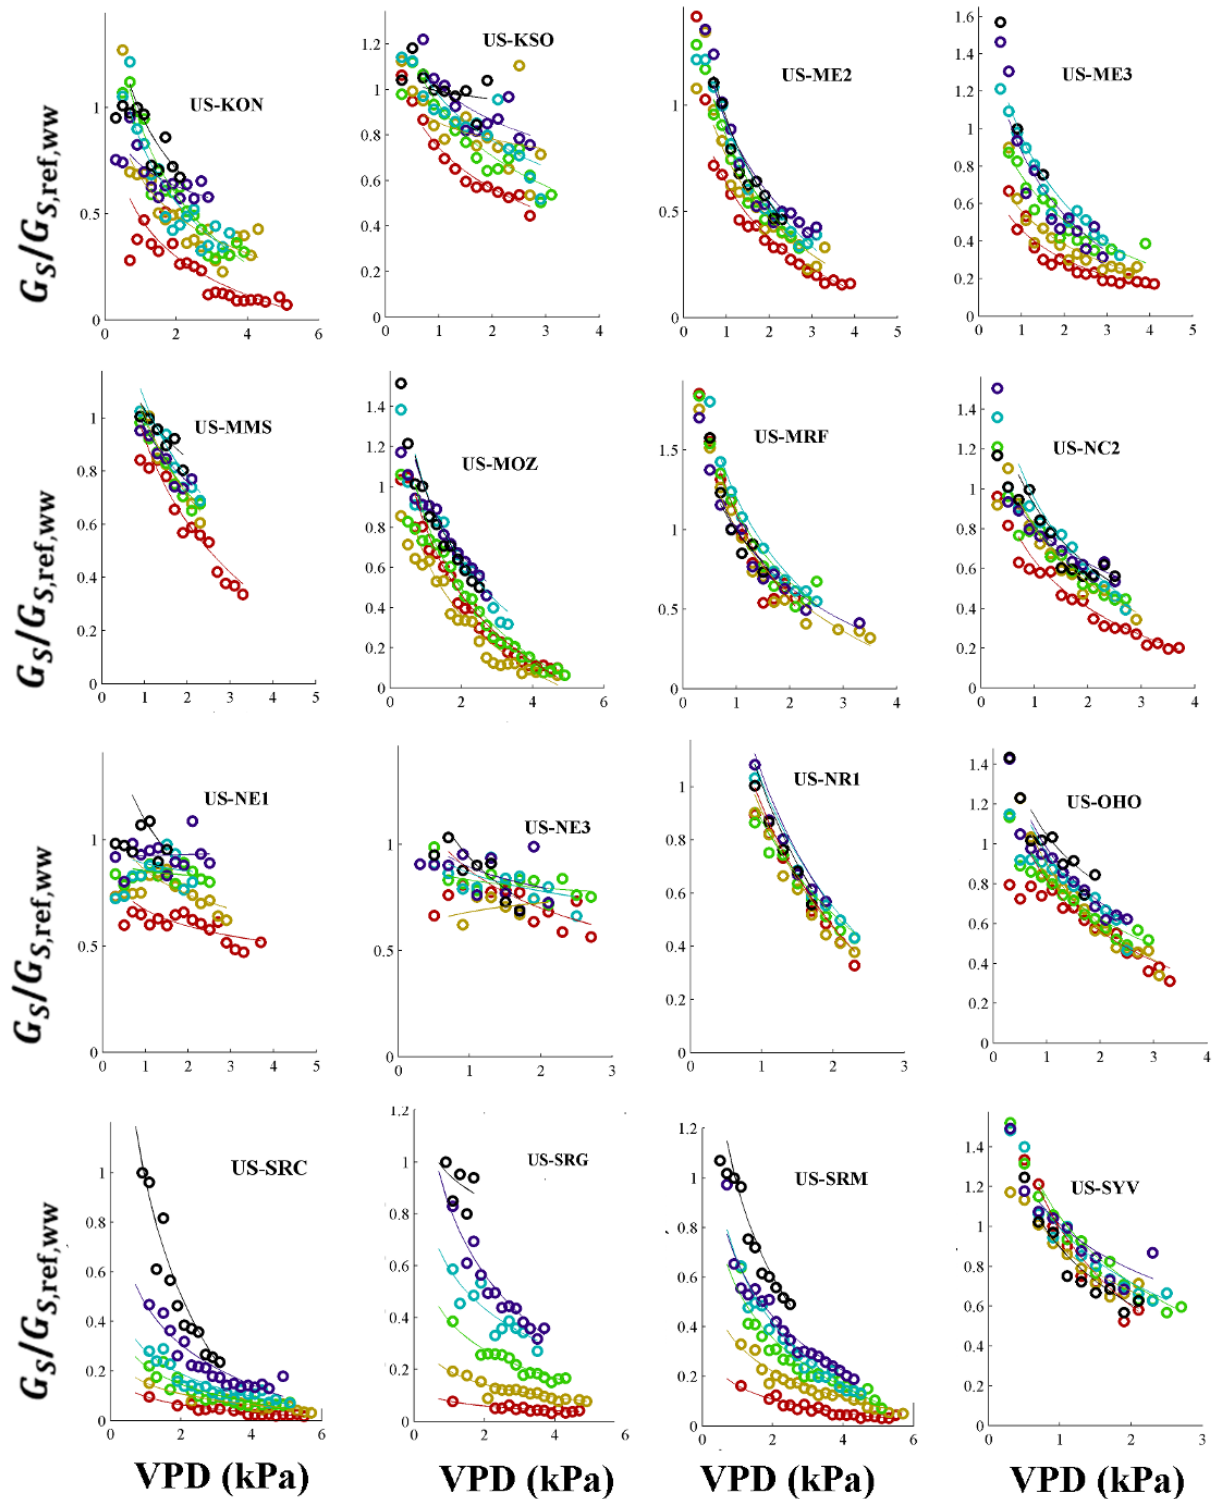

Figure S8. Same as Figure 2a-d in the main text, but for the second sixteen study sites (in alphabetical order).



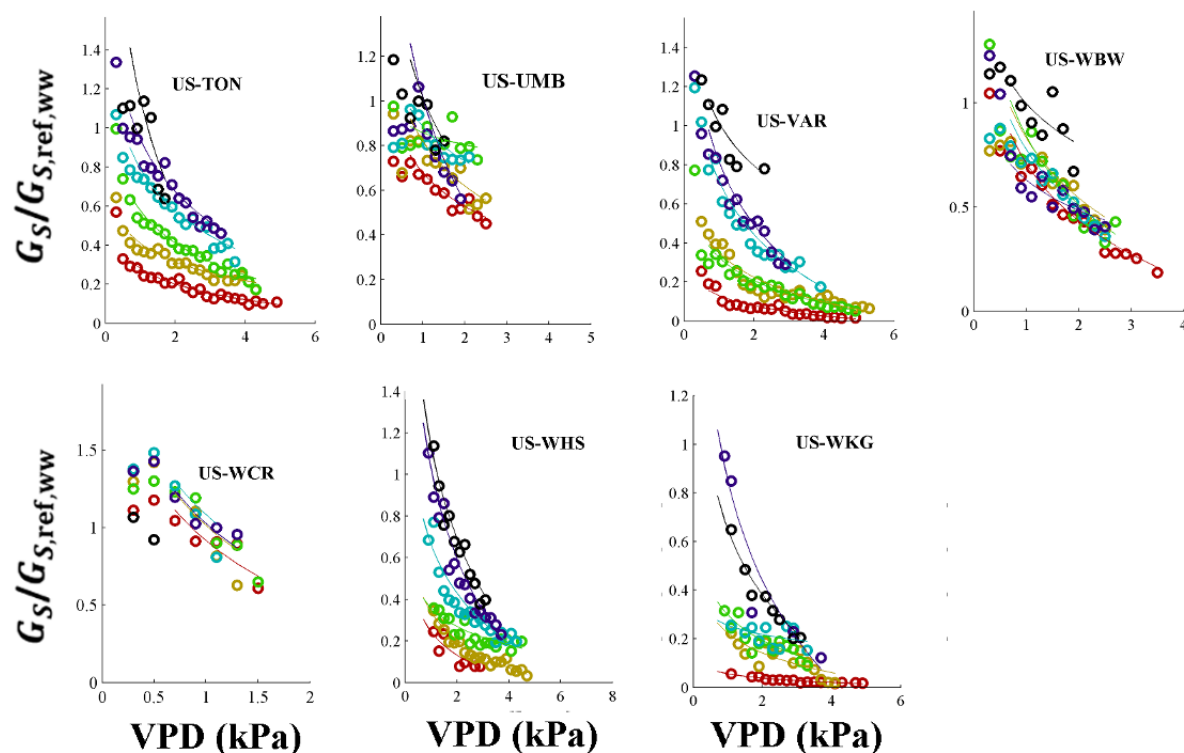

Figure S9. Same as Figure 2a-d in the main text, but for the last seven study sites (in alphabetical order).

## Section S7: Effects of other meteorological drivers on $G_{S,ref}$

Other work has demonstrated that the reference surface or stomatal conductance may be sensitive to variations in photosynthetically active radiation (PAR) and air temperature ( $T_a$ )<sup>51, 53</sup>. In this study, variations in  $G_{S,ref}$  with PAR or  $T_a$  were not explicitly considered, due primarily to the fact that accounting for them (for example, by introducing additional dimensions to the data binning matrix) often results in an insufficient amount of data within each soil moisture bin to properly parameterize Eq. 1. This is particularly true in sites with a short active season, which include both the hottest and coolest sites in the dataset.

In all sites, VPD is directly correlated with temperature (reflecting the fact that the saturation vapor pressure depends exponentially on  $T_a$ ), and also directly correlated with PAR (since  $T_a$  tends to be highest when radiation loads are high, see Figure S10). Soil moisture tends to be inversely correlated with  $T_a$  in most sites, and only weakly related to PAR (again, see Figure S10).

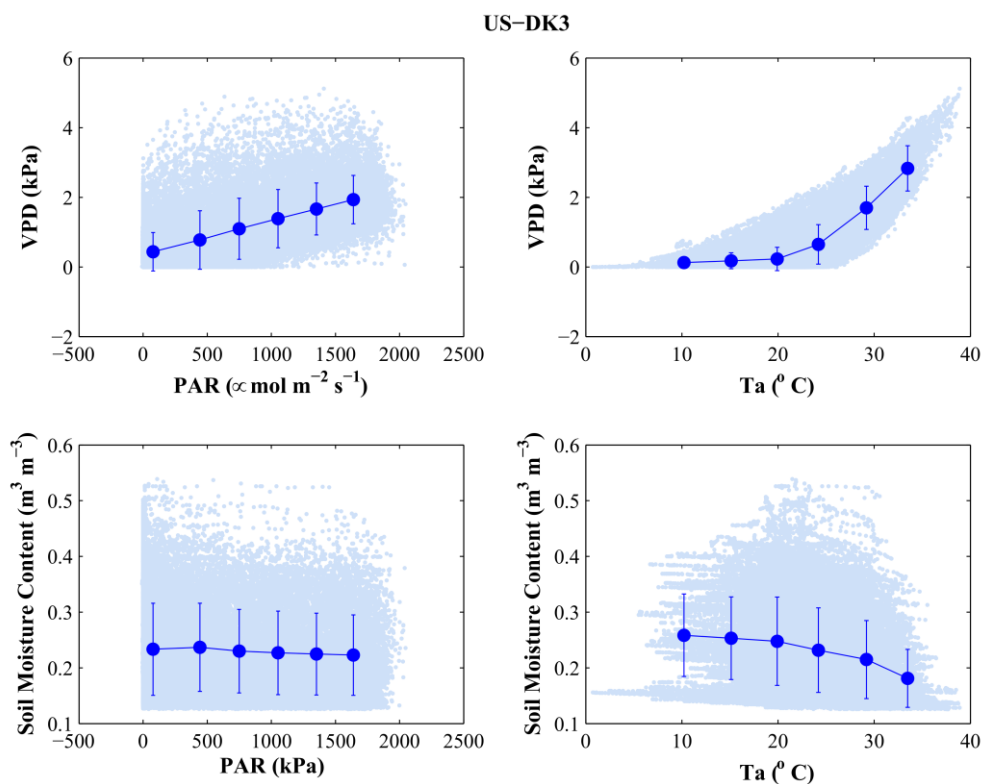

Figure S10: The relationship between vapor pressure deficit (VPD), photosynthetically active radiation (PAR) and air temperature ( $T_a$ ) at the Duke Forest pine plantation (US-DK3). Light blue dots show all data, and blue circles show binned averages. Error bars show one standard deviation.

It is possible that high  $T_a$  may limit  $G_s$  and ET through biochemical limitations to leaf-level gas exchange<sup>54</sup> that occur independent of limitations to  $G_s$  imposed by high VPD. In that case, failure to resolve temperature effects on  $G_s$  could lead us to overestimate the VPD limitations and underestimate the soil moisture limitations. On the other hand, because canopy stomatal conductance is known to be

monotonically related to PAR<sup>51,55</sup>, failure to account for independent PAR effects could lead us to underestimate VPD limitations and overestimate soil moisture limitations.

To explore the extent to which these biases are significant, in each site, we attempted separate parameterizations for Eq. 1 when PAR was limited to high values ( $\text{PAR} > 1500 \mu\text{mol m}^{-2} \text{s}^{-1}$ ) and when  $T_a$  was limited to a relatively narrow range of 5 °C. In both cases, data were binned according to soil moisture content as described in the methods of the main text. The range of temperature depended on the mean growing season  $T_a$  at each site but was usually between 20 and 25 °C. Enough growing season data were available to support this effort in 23 of the sites. In general, the  $G_{s,\text{ref},j}$  (i.e.  $G_{s,\text{ref}}$  for each of the  $j=6$  soil moisture bins) were similar regardless of whether the full or filtered datasets were used (see Fig S11 for results from representative sites). Specifically, across all sites, the slope of the relationship between the  $G_{s,\text{ref}}$  values obtained from the full dataset as compared to the dataset filtered to a narrow temperature range was 0.97 on average (st. dev. = 0.44), and the average correlation coefficient was 0.75. Similarly, the slope of the relationship between the  $G_{s,\text{ref}}$  values obtained from the full dataset as compared to the dataset filtered to a PAR range was 1.02 on average (std dev. = 0.40), and the average correlation coefficient was 0.80. Thus, the decision not to account for PAR and  $T_a$  effects on  $G_{s,\text{ref}}$  does not introduce systematic biases across the sites.

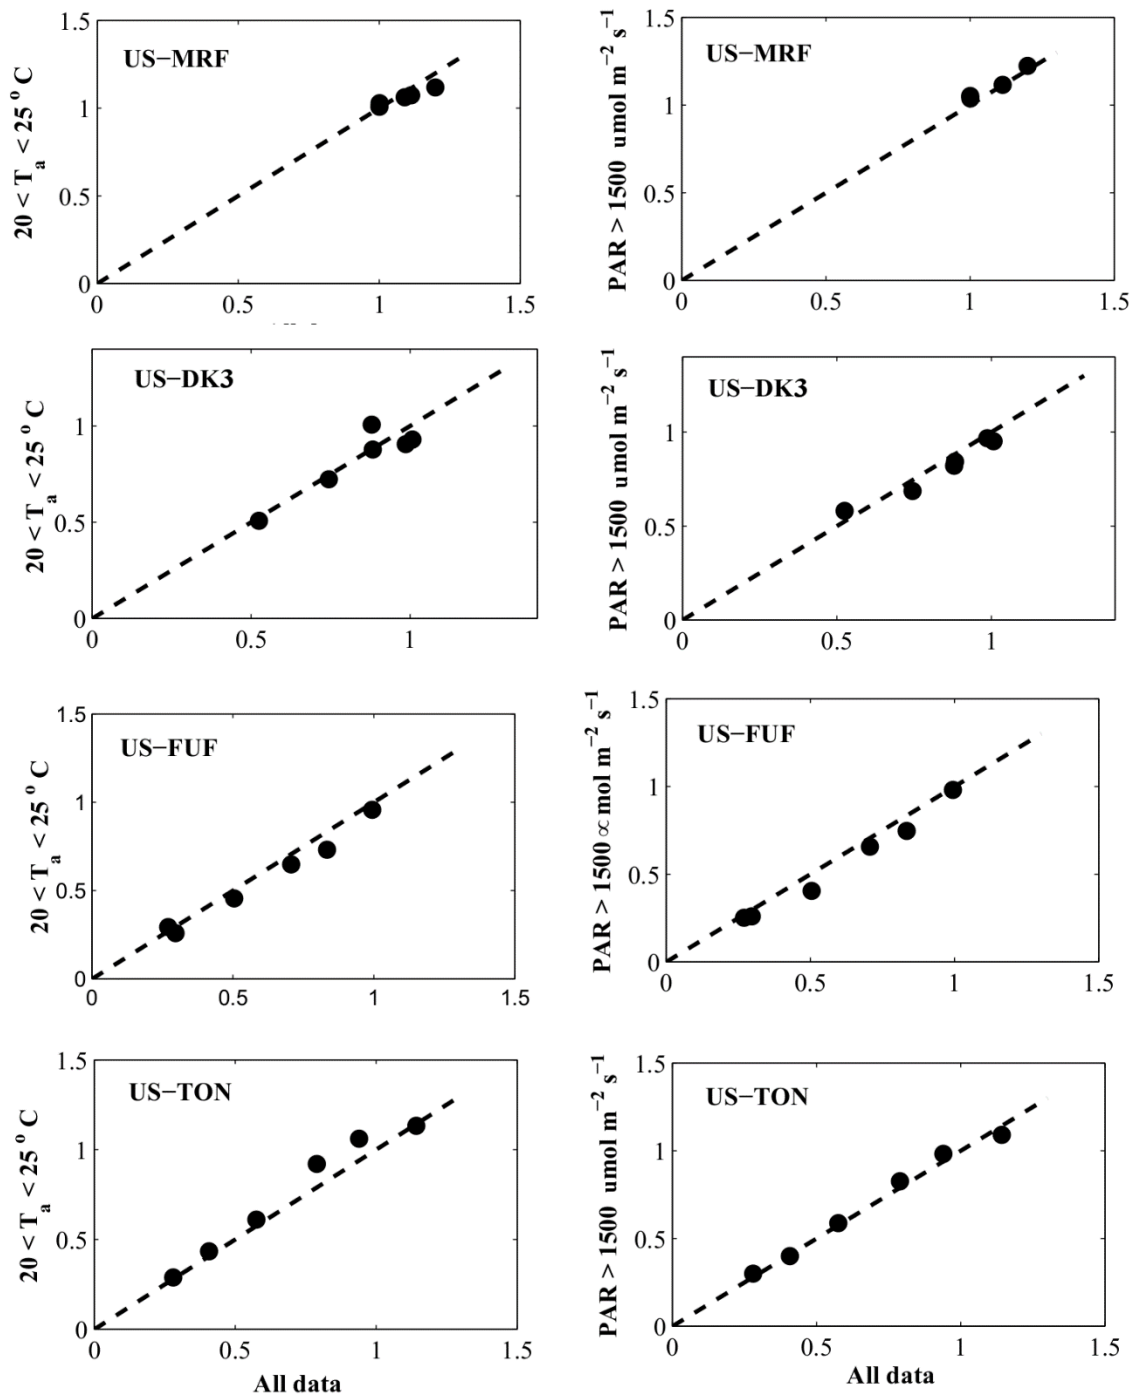

Figure S11: The relationship between the reference  $G_s$  within each soil moisture bin (i.e.  $G_{s,\text{ref},j}$ ) as derived from all growing season data (subject to the filtering constraints described in Section S1), and data subjected to an additional temperature filter (left hand column) or PAR filter (right hand column). The sites shown here span a range of dryness index (see Table S1).

## Section S8: Future projections – model estimates and downscaling

Projections for future meteorological variables, including  $R_n$ , VPD, air temperature, and precipitation were obtained from ten general circulation models for the period from 2071–2080, chosen as the transition point between the mid- and late-21<sup>st</sup> century. Modeled data were downscaled in space using parametric approaches, and downscaled in time using representative diurnal patterns measured at each study site. Future soil moisture was estimated from a marginal distribution sampling approach based on short- and long-term dynamics of VPD and precipitation that reproduced observed soil moisture dynamics with little bias. The future VPD and soil moisture limitations to  $G_s$  and ET were then determined in a manner analogous to the approach for present day conditions.

**Obtaining projections of future meteorological drivers:** Estimates of the key drivers of the Penman-Monteith model were obtained from the Multivariate Adaptive Constructed Analogs (MACA<sup>56</sup>) data warehouse (<http://maca.northwestknowledge.net/>) for a representative selection of twelve Ameriflux sites that include long-running towers and that span a wide gradient in climate (See Table S1). Specifically, we obtained daily time series of net radiation, air temperature, specific humidity, and wind speed projected from 10 General Circulation Models from the Coupled Model Intercomparison Project – Phase 5 (CMIP5) archive driven by representative concentration pathway 8.5 (highest greenhouse gas emission scenario) were downloaded for the period 1950–2099. The ten models are listed in Table S3.

Table S3: The models used to obtain estimates of future meteorological drivers

| Model Name                     | Model Country  | Model Agency                                                                                                                                                              |
|--------------------------------|----------------|---------------------------------------------------------------------------------------------------------------------------------------------------------------------------|
| <a href="#">CanESM2</a>        | Canada         | Canadian Centre for Climate Modeling and Analysis                                                                                                                         |
| <a href="#">CNRM-CM5</a>       | France         | National Centre of Meteorological Research, France                                                                                                                        |
| <a href="#">CSIRO-Mk3-6-0</a>  | Australia      | Commonwealth Scientific and Industrial Research Organization/Queensland Climate Change Centre of Excellence, Australia                                                    |
| <a href="#">GFDL-ESM2G</a>     | USA            | NOAA Geophysical Fluid Dynamics Laboratory, USA                                                                                                                           |
| <a href="#">HadGEM2-ES</a>     | United Kingdom | Met Office Hadley Center, UK                                                                                                                                              |
| <a href="#">inmcm4</a>         | Russia         | Institute for Numerical Mathematics, Russia                                                                                                                               |
| <a href="#">IPSL-CM5A-LR</a>   | France         | Institut Pierre Simon Laplace, France                                                                                                                                     |
| <a href="#">MIROC-ESM-CHEM</a> | Japan          | Japan Agency for Marine-Earth Science and Technology, Atmosphere and Ocean Research Institute (The University of Tokyo), and National Institute for Environmental Studies |
| <a href="#">MIROC5</a>         | Japan          | Atmosphere and Ocean Research Institute (The University of Tokyo), National Institute for Environmental Studies, and Japan Agency for Marine-Earth Science and Technology |

**Spatial downscaling of the model data:** While the MACA CMIP data have already been downscaled with respect to the climate models, the spatial resolution of these data (4 km x 4 km) still exceeds the size of a typical flux footprint (typically <1 square km during the daytime). Furthermore, significant biases were observed between the CMIP and observed meteorological drivers. Thus, the meteorological data were further downscaled using a parametric approach driven by the site-level observations.

Specifically, for air temperature, VPD,  $R_n$ , and wind speed, histograms of the downscaled GCM data for the period coincident with the study period at each site were compared to histograms of the measured data after the latter was aggregated to daily averages to match the temporal resolution of the modeled data. Biases were removed by first log-transforming both datasets, and then determining the mean and standard deviation of the resulting log-normal distributions. The modeled time series were then further transformed to a standard log-normal variable that was then scaled using the mean and standard deviation of the log-transformed measured time series, and exponentiated (hereafter the “modeled<sub>present,scaled</sub>” data). This downscaling was performed separately for each model.

Next, the modeled meteorological time series for the period 2071–2080 were extracted as representative of the mid-to-late 21<sup>st</sup> century. The shift in the mean of each modeled variable between the measurement (“present”) time period and the future was determined from the unscaled daily projections according to:

$$\mu_{\text{factor}} = \left( \frac{\text{mean}[\ln(\text{modeled}_{2071-2080})]}{\text{mean}[\ln(\text{modeled}_{\text{present}})]} \right) \quad (\text{S4})$$

$$\sigma_{\text{factor}} = \left( \frac{\text{stdev}[\ln(\text{modeled}_{2071-2080})]}{\text{stdev}[\ln(\text{modeled}_{\text{present}})]} \right) \quad (\text{S5})$$

The time series for the period 2071–2080 was then transformed into a standard normal variable that was scaled using the mean and standard deviation of the modeled<sub>present,scaled</sub> distributions after correcting those moments by  $\mu$ -factor and  $\sigma$ -factor, respectively. This approach preserves the projected relative changes in the mean and variance of the modeled time series between the present and future conditions, but retains the spatial downscaling to the site level.

**Projecting future relative extractable soil water:** Projections of downscaled soil moisture were not available from the MACA data warehouse. Thus, future soil moisture (at a daily time step) was estimated using a site-specific marginal distribution sampling approach (i.e. a look-up table), similar to the approaches frequently used to gapfill missing eddy covariance data<sup>57</sup>. Accordingly, measured  $\theta$  data were binned according to the following classification scheme, which depends on the total time since a significant rain event (>20 mm), among other hydrologic variables:

1) If the time since a significant (>20 mm) rain event is less than two days, then soil moisture is the mean of measured values when:

- The total precipitation within the last 7 days agrees to within 10 mm
- The day-of-year agrees to within 10 days;

else, 2) If the time since a significant (>20 mm) rain event is between 2 and 3 days, then soil moisture is the mean of measured values when:

- The total precipitation within the last 30 days agrees to 20 mm
- The total precipitation within the last 7 days agrees to 10 mm
- The mean VPD within the last 30 days agrees to within 0.15 kPa
- The day-of-year agrees to within 10 days;

else, 3) If the time since a significant (>20 mm) rain event is greater than three days, then soil moisture is the mean of measured values when:

- The time since a significant rain event agrees to within 5 days
- The total precipitation within the last 30 days agrees to 20 mm
- The total precipitation within the last 7 days agrees to 10 mm
- The mean VPD within the last 30 days agrees to within 0.15 kPa
- The day-of-year agrees to within 10 days

Most of the data fall into category three. We found that it was sometimes necessary to iteratively relax the search criteria in order to obtain at least two observations of soil moisture that match the criteria for every hourly or half-hour observation in the record. Specifically, for category three data, the criteria were loosened as follows:

#### ITERATION 2:

- *The time since a significant rain event agrees to within 8 days*
- *The total precipitation within the last 30 days agrees to 30 mm*
- *The total precipitation within the last 7 days agrees to 20 mm*
- *The mean VPD within the last 30 days agrees to within .25 kPa*
- *The Julian day of year agrees to within 20 days*

#### ITERATION 3:

- *The time since a significant rain event agrees to within 10 days*
- *The total precipitation within the last 30 days agrees to 40 mm*
- *The total precipitation within the last 7 days agrees to 30 mm*
- *The mean VPD within the last 30 days agrees to within 0.4 kPa*
- *The day-of-year agrees to within 180 days*

#### ITERATION 4:

- *The mean VPD within the last 30 days agrees to within 0.4 kPa*

Any remaining gaps in the modeled  $\theta$  record were linearly interpreted.

In general, the marginal distribution sampling approach reproduced measured  $\theta$  time series very well. A representative case is shown in Figure S10 and S11 for US-DK3, the Duke Pine Forest Site. Figure S12 shows the slope and correlation coefficient ( $r^2$ ) between the measured and modeled  $\theta$  for all sites used in this portion of the analysis. Biases in the slope were less than 5% in most sites, and correlation was generally between 0.8 and 1.0.



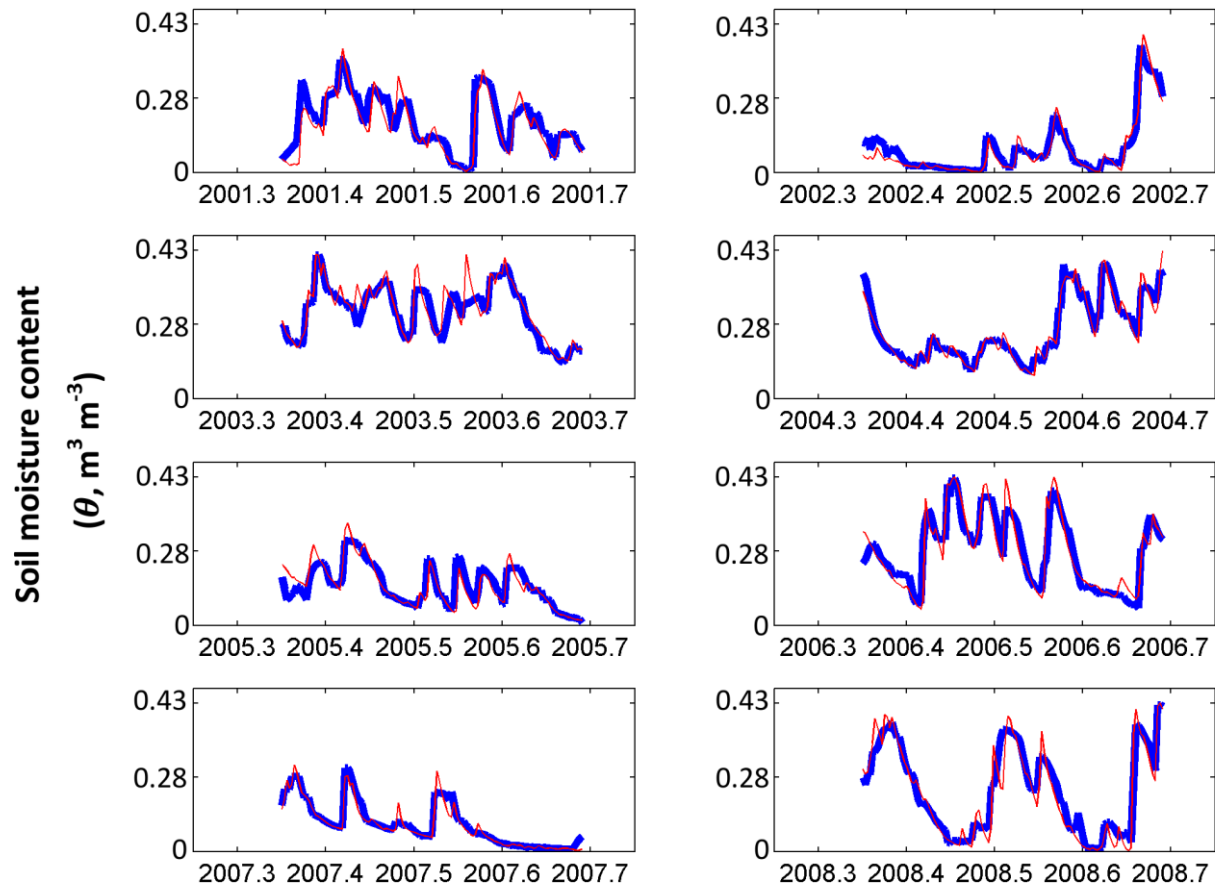

430  
431

432 *Figure S10: The measured (red) and modeled (blue line) trends in growing season, daily-averaged soil*  
433 *moisture content ( $\theta$ ) for the eight site-years of data available from the Duke Pine Forest Site (US-DK3).*

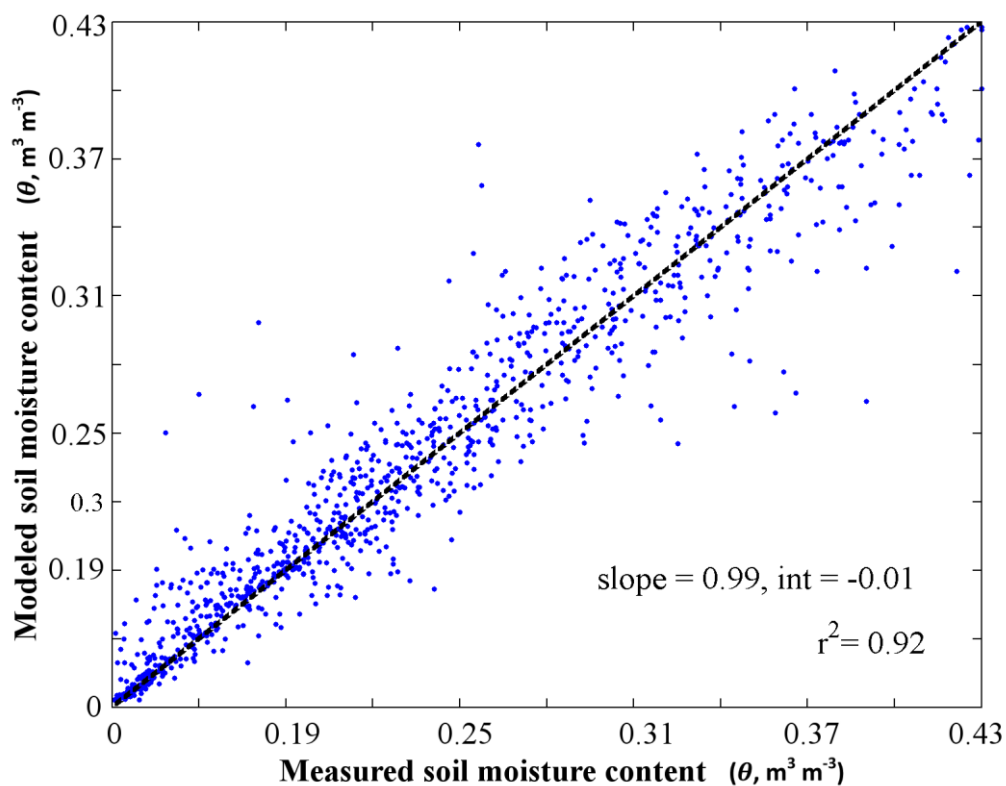

Figure S11: The 1:1 comparison between modeled and measured daily soil moisture content in the Duke Forest Pine Site (US-DK 3).

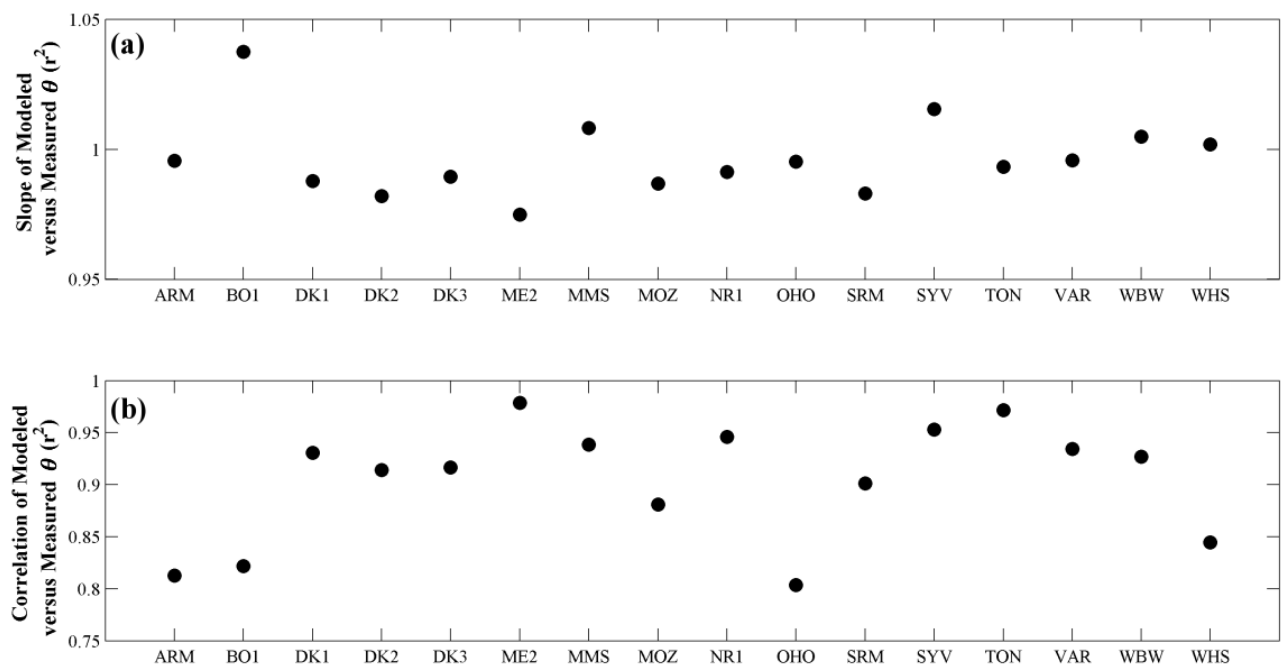

Figure S12: The slope (top panel) and correlation coefficient (bottom panel) between modeled and measured soil moisture content across all of the sites included in the analysis of future limitations to surface conductance and ET.

**Future changes in key meteorological drivers:** The following figures (Figure S13-16) show the present and projected future means for the key drivers of the Penman-Monteith equation. In every site, nearly all models project increases in future VPD relative to present, occurring concurrently with projected increases in air temperature ( $T_a$ ). Projected changes in net radiation ( $R_n$ ) and wind speed ( $U$ ) are relatively small. Models tend to agree on the change in  $\theta$  at each site, although across sites no clear trends emerged (i.e., it increases in some, but decreases in others).

Because it is important to preserve the coupling between precipitation and VPD when determining how soil moisture and VPD limit ET, the models were not ensemble averaged. Rather, each of the ten models was used to quantify the limitation to future ET from soil moisture and VPD, and these limitations were then ensemble averaged across the model runs.

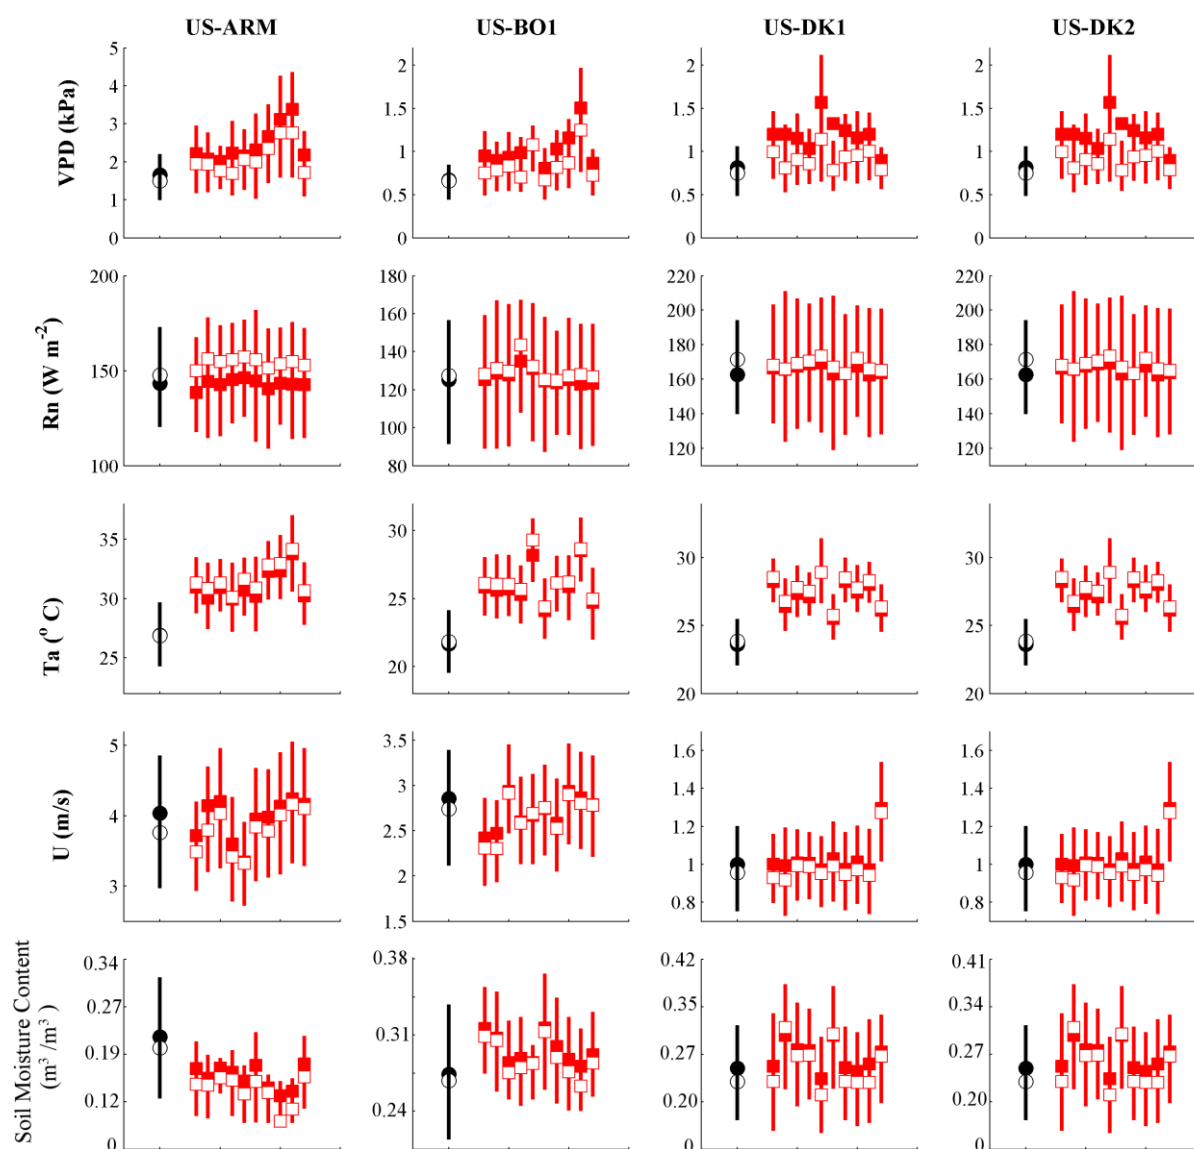

458

459 *Figure S13: The mean (filled symbols) and median (open symbols) daytime growing season value for key*  
 460 *meteorological drivers for present climate conditions (black symbols, derived from Ameriflux*  
 461 *observations) and the future (red symbols, derived from model predictions) for select study sites. Error*  
 462 *bars show the 50% range daytime values of each variable, and are expected to overlap as these*  
 463 *meteorological drivers experience wide shifts over the course of a day and the course of the growing*  
 464 *season. The future data and associated error lines are associated with the ten models of Table S3, in*  
 465 *sequential order.*

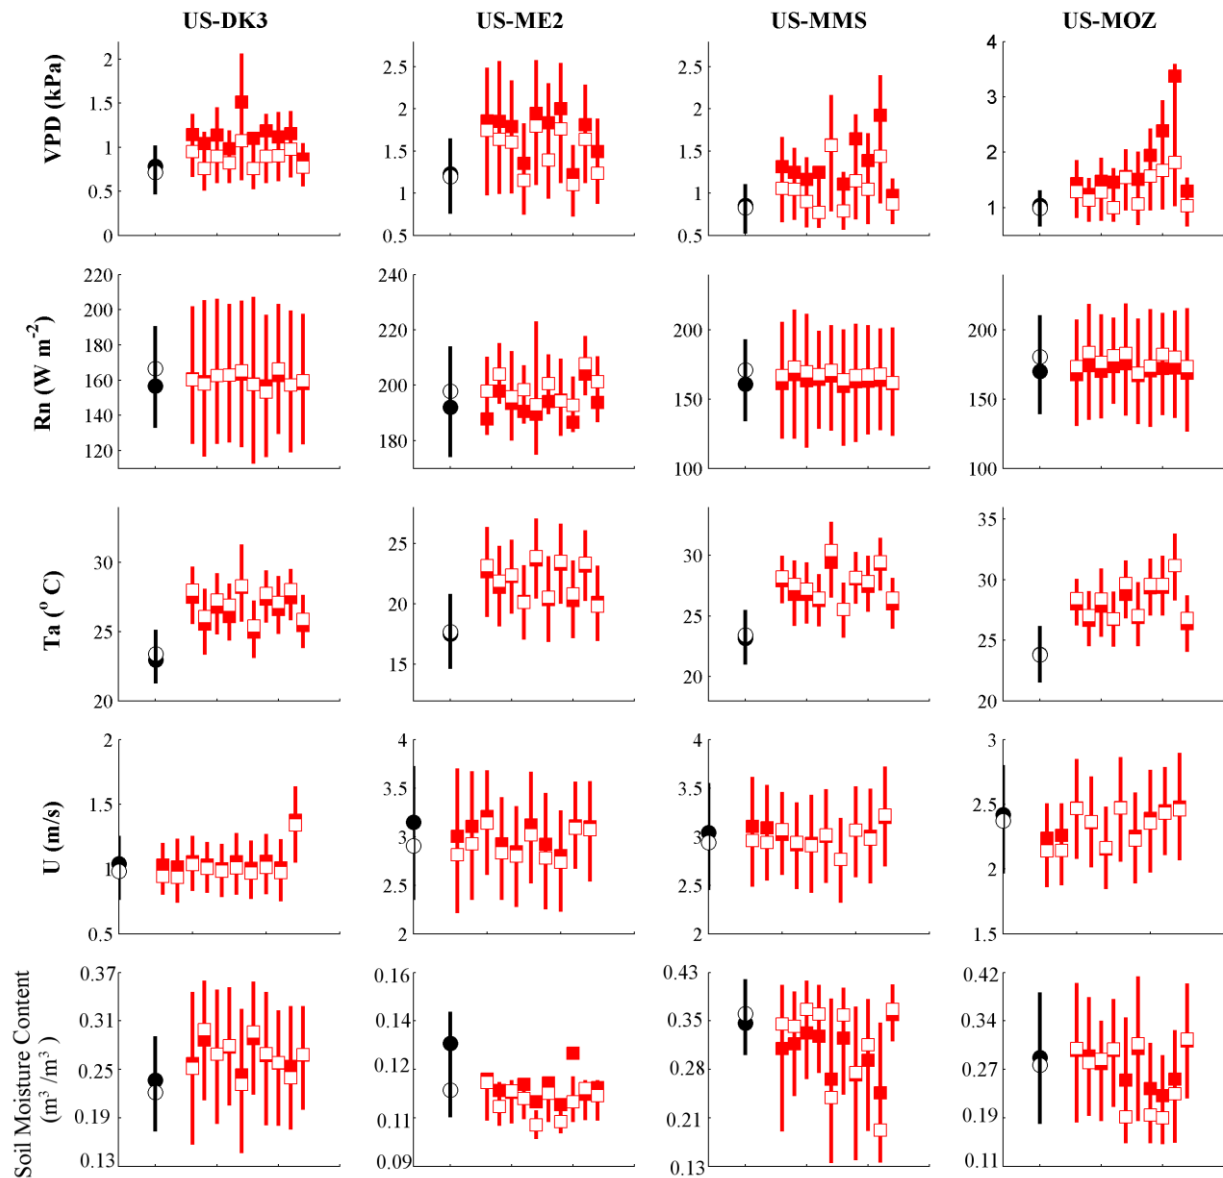

Figure S14: Same as Figure S13, but for additional sites

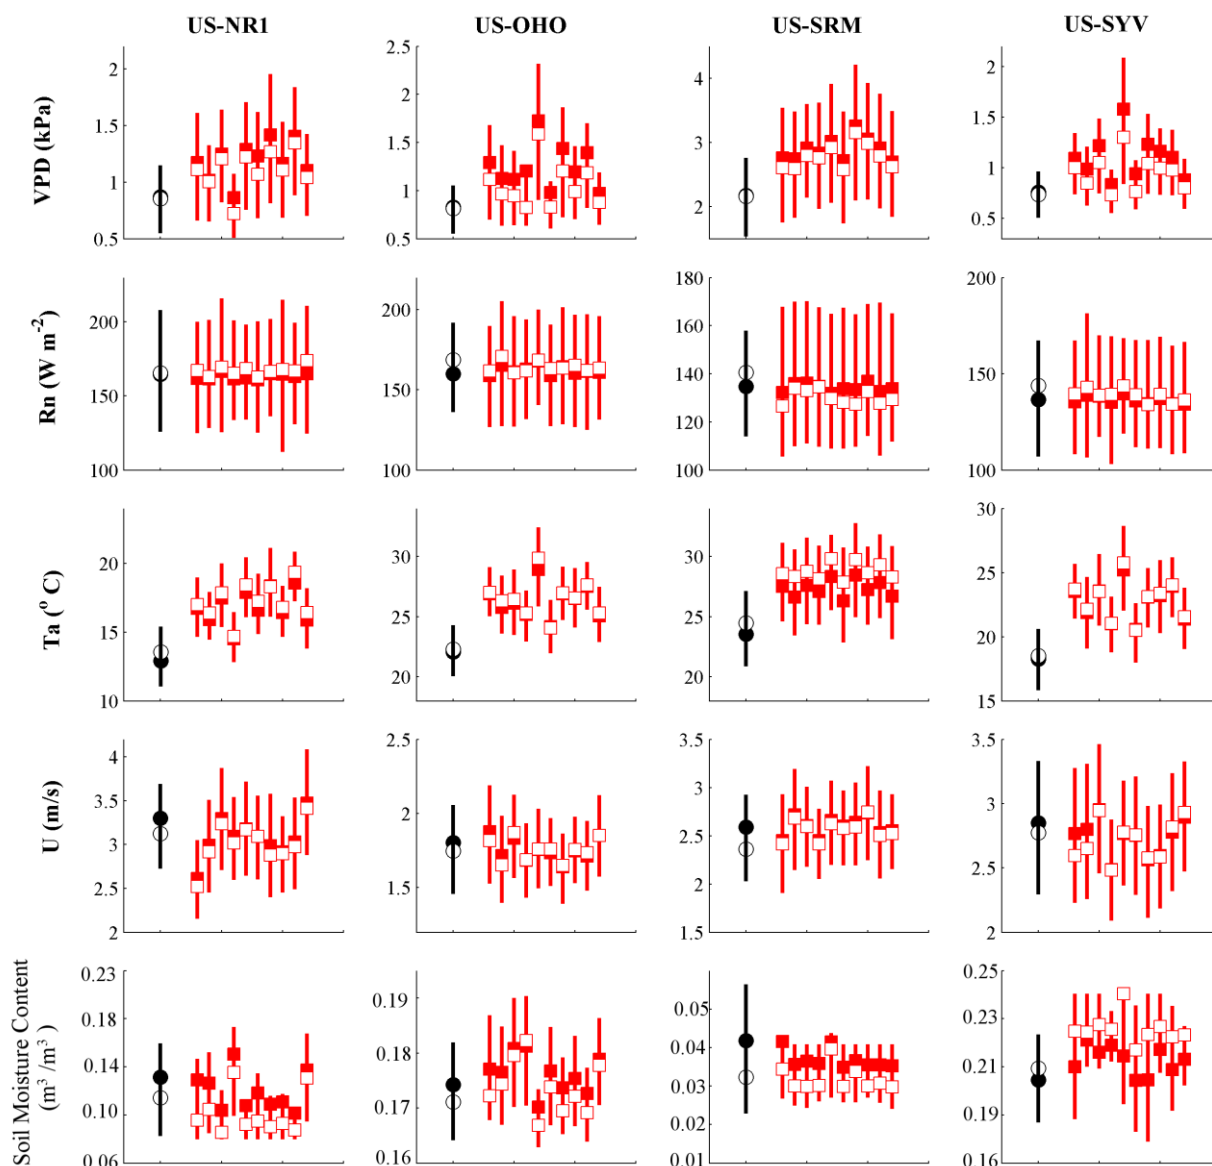

Figure S15: Same as Figure 14, but for additional sites

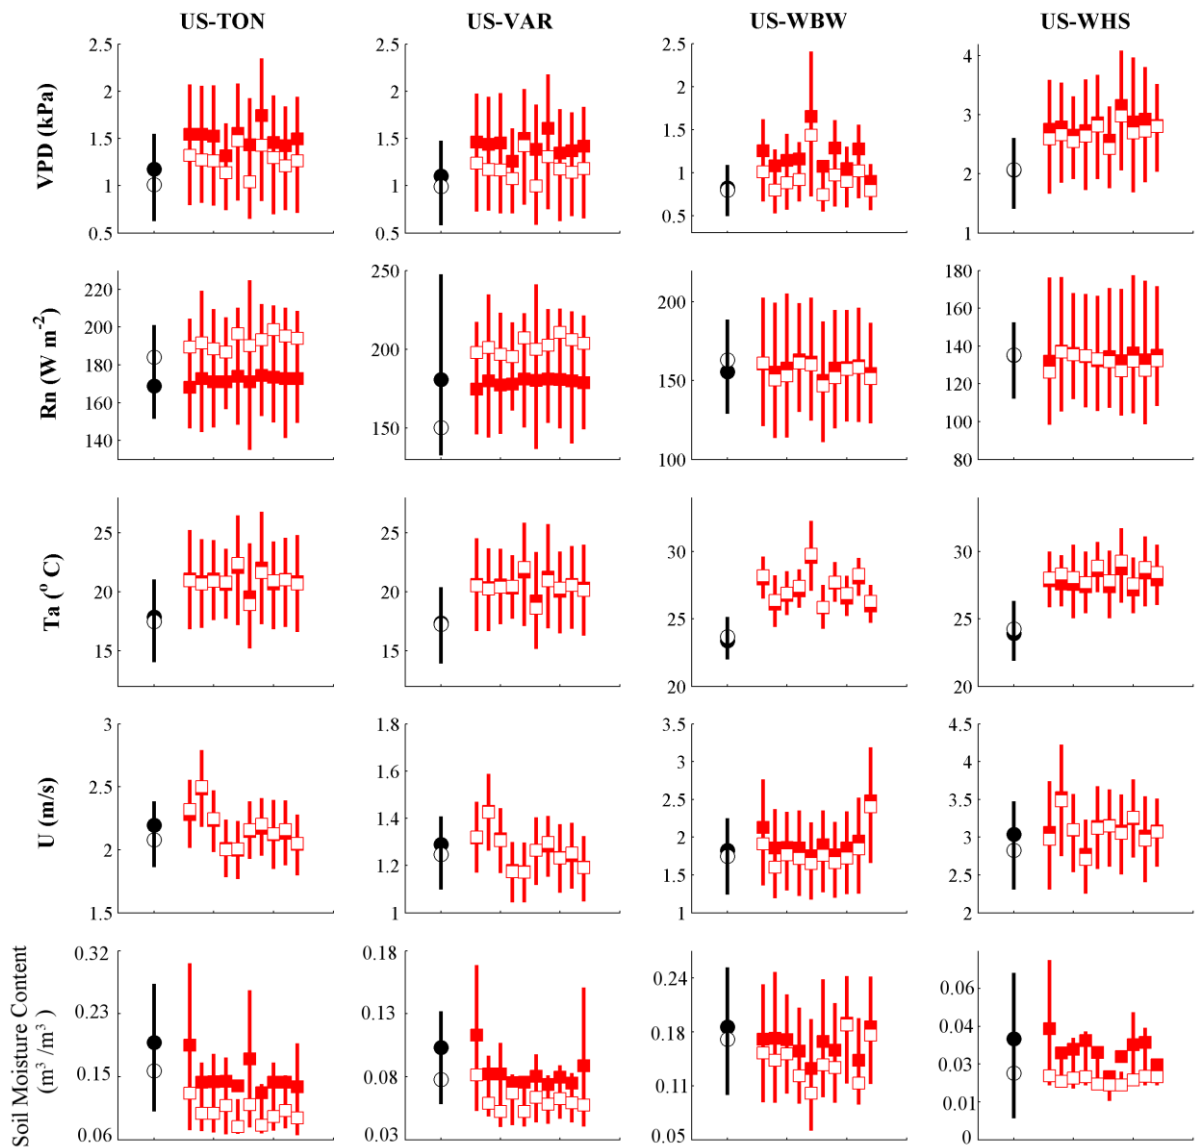

Figure S16: Same as Figure 15, but for additional sites



# Works Cited in the Supplementary Information:

1. Fischer ML, Billesbach DP, Berry JA, Riley WJ, Torn MS. Spatiotemporal variations in growing season exchanges of CO<sub>2</sub>, H<sub>2</sub>O, and sensible heat in agricultural fields of the Southern Great Plains. *Earth Interactions* 2007, **11**: DOI: 10.1175/EI231.1.
2. Jenkins JP, Richardson AD, Braswell BH, Ollinger SV, Hollinger DY, Smith ML. Refining light-use efficiency calculations for a deciduous forest canopy using simultaneous tower-based carbon flux and radiometric measurements. *Agricultural and Forest Meteorology* 2007, **143**(1-2): 64-79.
3. Goldstein A, Hultman N, Fracheboud J, Bauer M, Panek J, Xu M, *et al.* Effects of climate variability on the carbon dioxide, water, and sensible heat fluxes above a ponderosa pine plantation in the Sierra Nevada (CA). *Agricultural and Forest Meteorology* 2000, **101**(2): 113-129.
4. Meyers TP, Hollinger SE. An assessment of storage terms in the surface energy balance of maize and soybean. *Agricultural and Forest Meteorology* 2004, **125**(1-2): 105-115.
5. Hernandez-Ramirez G, Hatfield JL, Parkin TB, Sauer TJ, Prueger JH. Carbon dioxide fluxes in corn-soybean rotation in the midwestern US: Inter- and intra-annual variations, and biophysical controls. *Agricultural and Forest Meteorology* 2011, **151**(12): 1831-1842.
6. Novick KA, Oishi AC, Ward EJ, Siqueira MBS, Juang JY, Stoy PC. On the difference in the net ecosystem exchange of CO<sub>2</sub> between deciduous and evergreen forests in the southeastern U.S. *Global Change Biology* 2015, **21**: 827-842. .
7. Stoy PC, Katul GG, Siqueira MBS, Juang JY, Novick KA, McCarthy HR, *et al.* Role of vegetation in determining carbon sequestration along ecological succession in the southeastern United States. *Global Change Biology* 2008, **14**(6): 1409-1427.
8. Allison VJ, Miller RM, Jastrow JD, Matamala R, Zak DR. Changes in soil microbial community structure in a tallgrass prairie chronosequence. *Soil Science Society of America Journal* 2005, **69**(5): 1412-1421.
9. Dore S, Kolb TE, Montes-Helu M, Eckert SE, Sullivan BW, Hungate BA, *et al.* Carbon and water fluxes from ponderosa pine forests disturbed by wildfire and thinning. *Ecological Applications* 2010, **20**(3): 663-683.

10. Heinsch F, Heilman J, McInnes K, Cobos D, Zuberer D, Roelke D. Carbon dioxide exchange in a high marsh on the Texas Gulf Coast: effects of freshwater availability. *Agricultural and Forest Meteorology* 2004, **125**(1): 159-172.
11. Musselman R, Massman W, Frank J, Korfmacher J. The temporal dynamics of carbon dioxide under snow in a high elevation Rocky Mountain subalpine forest and meadow. *Arctic, antarctic, and alpine research* 2005, **37**(4): 527-538.
12. Brunsell N, Nippert J, Buck T. Impacts of seasonality and surface heterogeneity on water-use efficiency in mesic grasslands. *Ecohydrology* 2014, **7**(4): 1223-1233.
13. Scott, R.L., Biederman, J.A., Hamerlynck, E.P. and Barron-Gafford, G.A. 2015. The carbon balance pivot point of southwestern U.S. semiarid ecosystems: Insights from the 21st century drought. *Journal of Geophysical Research: Biogeosciences*, 120, 2612-2624. doi: 10.1002/2015JG003181.
14. Thomas CK, Martin JG, Law BE, Davis K. Toward biologically meaningful net carbon exchange estimates for tall, dense canopies: Multi-level eddy covariance observations and canopy coupling regimes in a mature Douglas-fir forest in Oregon. *Agricultural and Forest Meteorology* 2013, **173**: 14-27.
15. Verma SB, Dobermann A, Cassman KG, Walters DT, Knops JM, Arkebauer TJ, *et al.* Annual carbon dioxide exchange in irrigated and rainfed maize-based agroecosystems. *Agricultural and Forest Meteorology* 2005, **131**(1): 77-96.
16. Campbell J, Sun O, Law B. Supply-side controls on soil respiration among Oregon forests. *Global Change Biology* 2004, **10**(11): 1857-1869.
17. Vickers D, Thomas C, Law BE. Random and systematic CO<sub>2</sub> flux sampling errors for tower measurements over forests in the convective boundary layer. *Agricultural and Forest Meteorology* 2009, **149**(1): 73-83.
18. Gu L, Pallardy S, Hosman K, Sun Y. Drought-influenced mortality of tree species with different predawn leaf water dynamics in a decade-long study of a central US forest. *Biogeosciences* 2015, **12**(10): 2831-2845.
19. Seco R, Karl T, Guenther A, Hosman KP, Pallardy SG, Gu L, *et al.* Ecosystem-scale VOC fluxes during an extreme drought in a broad-leaf temperate forest of the Missouri Ozarks (central USA). *Global Change Biology* 2015, **21**: 3657-3674.
20. Roman DT, Novick KA, Brzostek ER, Dragoni D, Rahman AF, Phillipps R. The role of isohydric and anisohydric species in determining ecosystem-scale response to severe drought. *Oecologia* 2015, **179**(3): 641-654.

21. Noomets A, Gavazzi MJ, McNulty SG, Domec J-C, Sun G, King JS, *et al.* Response of carbon fluxes to drought in a coastal plain loblolly pine forest. *Global Change Biology* 2009, **16**: 272-287.
22. Monson R, Turnipseed A, Sparks J, Harley P, Scott-Denton L, Sparks K, *et al.* Carbon sequestration in a high-elevation, subalpine forest. *Global Change Biology* 2002, **8**(5): 459-478.
23. DeForest JL, Noormets A, McNulty SG, Sun G, Tenney G, Chen J. Phenophases alter the soil respiration-temperature relationship in an oak-dominated forest. *International Journal of Biometeorology* 2006, **51**(2): 135-144.
24. Sanchez-Mejia ZM, Papuga SA. Observations of a two-layer soil moisture influence on surface energy dynamics and planetary boundary layer characteristics in a semiarid shrubland. *Water Resources Research* 2014, **50**(1): 306-317.
25. Desai AR, Bolstad PV, Cook BD, Davis KJ, Carey EV. Comparing net ecosystem exchange of carbon dioxide between an old-growth and mature forest in the upper Midwest, USA. *Agricultural and Forest Meteorology* 2005, **128**(1-2): 33-55.
26. Ma S, Baldocchi DD, Xu L, Hehn T. Inter-annual variability in carbon dioxide exchange of an oak/grass savanna and open grassland in California. *Agricultural and Forest Meteorology* 2007, **147**(3): 157-171.
27. Curtis PS, Hanson PJ, Bolstad P, Barford C, Randolph J, Schmid H, *et al.* Biometric and eddy-covariance based estimates of annual carbon storage in five eastern North American deciduous forests. *Agricultural and Forest Meteorology* 2002, **113**(1): 3-19.
28. Verma SB, Baldocchi DD, Anderson DE, Matt DR, Clement RJ. Eddy fluxes of CO<sub>2</sub>, water vapor, and sensible heat over a deciduous forest. *Boundary-Layer Meteorology* 1986, **36**(1-2): 71-91.
29. McDowell N, Barnard H, Bond BJ, Hinckley T, Hubbard RM, Ishii H, *et al.* The relationship between tree height and leaf area: sapwood area ratio. *Oecologia* 2002, **132**(1): 12-20.
30. Novick K, Oren R, Stoy P, Juang JY, Siqueira M, Katul G. The relationship between reference canopy conductance and simplified hydraulic architecture. *Advances in Water Resources* 2009, **32**(6): 809-819.
31. Oren R, Sperry JS, Katul GG, Pataki DE, Ewers BE, Phillips N, *et al.* Survey and synthesis of intra- and interspecific variation in stomatal sensitivity to vapour pressure deficit. *Plant Cell Environ* 1999, **22**(12): 1515-1526.

- 617 32. Williams CA, Reichstein M, Buchmann N, Baldocchi D, Beer C, Schwalm C, *et al.* Climate and  
618 vegetation controls on the surface water balance: Synthesis of evapotranspiration measured across  
619 a global network of flux towers. *Water Resources Research* 2012, **48**(6).
- 620  
621 33. Penman HL. Natural Evaporation from Open Water, Bare Soil and Grass. *Proceedings of the*  
622 *Royal Society of London Series a-Mathematical and Physical Sciences* 1948, **193**(1032): 120-&.
- 623  
624 34. Monteith JL. Evaporation and environment. In: Fogg BD (ed). *The State and Movement of water*  
625 *in Living Organisms, Symposium of the Society of Experimental Biology*, vol. 19. Cambridge  
626 University Press: Cambridge, 1965, pp 205-234.
- 627  
628 35. Yan H, Wang S, Billesbach D, Oechel W, Zhang J, Meyers T, *et al.* Global estimation of  
629 evapotranspiration using a leaf area index-based surface energy and water balance model. *Remote*  
630 *sensing of environment* 2012, **124**: 581-595.
- 631  
632 36. Wilson KB, Hanson PJ, Mulholland PJ, Baldocchi DD, Wullschlegel SD. A comparison of  
633 methods for determining forest evapotranspiration and its components: sap-flow, soil water  
634 budget, eddy covariance and catchment water balance. *Agricultural and Forest Meteorology*  
635 2001, **106**(2): 153-168.
- 636  
637 37. Scanlon TM, Kustas WP. Partitioning evapotranspiration using an eddy covariance-based  
638 technique: Improved assessment of soil moisture and land-atmosphere exchange dynamics.  
639 *Vadose Zone Journal* 2012, **11**(3).
- 640  
641 38. Wang L, Niu S, Good SP, Soderberg K, McCabe MF, Sherry RA, *et al.* The effect of warming on  
642 grassland evapotranspiration partitioning using laser-based isotope monitoring techniques.  
643 *Geochimica Et Cosmochimica Acta* 2013, **111**: 28-38.
- 644  
645 39. Oishi AC, Oren R, Novick KA, Palmroth S, Katul GG. Interannual Invariability of Forest  
646 Evapotranspiration and Its Consequence to Water Flow Downstream. *Ecosystems* 2010, **13**(3):  
647 421-436.
- 648  
649 40. Sulman BN, Roman DT, Scanlon TM, Wang L, Novick KA. Comparing methods for partitioning  
650 a decade of carbon dioxide and water vapor fluxes in a temperate forest. *Agricultural and Forest*  
651 *Meteorology* 2016, **In press**.
- 652  
653 41. Baldocchi D, Meyers T. On using eco-physiological, micrometeorological and biogeochemical  
654 theory to evaluate carbon dioxide, water vapor and trace gas fluxes over vegetation: a perspective.  
655 *Agricultural and Forest Meteorology* 1998, **90**(1): 1-25.
- 656  
657 42. Schulze E-D, Kelliher FM, Korner C, Lloyd J, Leuning R. Relationships among maximum  
658 stomatal conductance, ecosystem surface conductance, carbon assimilation rate, and plant

- 659 nitrogen nutrition: a global ecology scaling exercise. *Annual Review of Ecology and Systematics*  
660 1994: 629-660.
- 661
- 662 43. Allen RG, Pereira LS, Raes D, Smith M. Crop evapotranspiration-Guidelines for computing crop  
663 water requirements-FAO Irrigation and drainage paper 56. *FAO, Rome* 1998, **300**(9): D05109.
- 664
- 665 44. Kelliher F, Leuning R, Raupach M, Schulze E-D. Maximum conductances for evaporation from  
666 global vegetation types. *Agricultural and Forest Meteorology* 1995, **73**(1): 1-16.
- 667
- 668 45. Campbell GS, Norman JM. *An Introduction to Environmental Biophysics*. Springer-Verlag: New  
669 York, 1998.
- 670
- 671 46. Stull RB. *An Introduction to Boundary Layer Meteorology*, vol. 13. Springer, 1988.
- 672
- 673 47. Ruehr NK, Martin JG, Law BE. Effects of water availability on carbon and water exchange in a  
674 young ponderosa pine forest: Above-and belowground responses. *Agricultural and forest*  
675 *meteorology* 2012, **164**: 136-148.
- 676
- 677 48. Breda N, Huc R, Granier A, Dreyer E. Temperate forest trees and stands under severe drought: a  
678 review of ecophysiological responses, adaptation processes and long-term consequences. *Annals*  
679 *of Forest Science* 2006, **63**(6): 625-644.
- 680
- 681 49. Clapp RB, Hornberger GM. Empirical equations for some hydraulic properties. *Water Resources*  
682 *Research* 1978, **14**(4): 601-604.
- 683
- 684 50. Tyree MT, Sperry JS. Vulnerability of xylem to cavitation and embolism. *Annual review of plant*  
685 *biology* 1989, **40**(1): 19-36.
- 686
- 687 51. Granier A, Loustau D, Breda N. A generic model of forest canopy conductance dependent on  
688 climate, soil water availability and leaf area index. *Annals of Forest Science* 2000, **57**(8): 755-  
689 765.
- 690
- 691 52. Ryan MG, Yoder BJ. Hydraulic limits to tree height and tree growth. *Bioscience* 1997, **47**(4):  
692 235-242.
- 693
- 694 53. Jarvis PG. Interpretation of Variations in Leaf Water Potential and Stomatal Conductance Found  
695 in Canopies in Field. *Philosophical Transactions of the Royal Society of London Series B-*  
696 *Biological Sciences* 1976, **273**(927): 593-610.
- 697
- 698 54. Bernacchi CJ, Pimentel C, Long SP. In vivo temperature response functions of parameters  
699 required to model RuBP-limited photosynthesis. *Plant Cell Environ* 2003, **26**(9): 1419-1430.

55. Oren R, Sperry JS, Ewers BE, Pataki DE, Phillips N, Megonigal JP. Sensitivity of mean canopy stomatal conductance to vapor pressure deficit in a flooded *Taxodium distichum* L. forest: hydraulic and non-hydraulic effects. *Oecologia* 2001, **126**(1): 21-29.
56. Abatzoglou JT, Brown TJ. A comparison of statistical downscaling methods suited for wildfire applications. *International Journal of Climatology* 2012, **32**(5): 772-780.
57. Reichstein M, Falge E, Baldocchi D, Papale D, Aubinet M, Berbigier P, *et al.* On the separation of net ecosystem exchange into assimilation and ecosystem respiration: review and improved algorithm. *Global Change Biology* 2005, **11**(9): 1424-1439.
